# Supplementary material for: Isolates from Colonic Spirochetosis in Humans Show High Genomic Divergence and Potential Pathogenic Features but Are Not Detected Using Standard Primers for the Human Microbiota
Source: PubMed Central journal article supplement (PMC6779451; doi:10.1128/jb.00272-19), 2019-10-04
Supplement: JB.00272-19-s0001.pdf [file JB.00272-19-s0001.pdf]

Supplementary table 1. Reference *Brachyspira* sequences

| Assembly accession | Species                           | Strain           | Assembly level  | Size (Mb) | GC%  | FTP path                                                                               |
|--------------------|-----------------------------------|------------------|-----------------|-----------|------|----------------------------------------------------------------------------------------|
| GCA_000518245.1    | <i>Brachyspira alvinipulli</i>    | ATCC 51933       | Scaffold        | 3.421     | 26.9 | ftp://ftp.ncbi.nlm.nih.gov/genomes/all/GCA/000/518/245/GCA_000518245.1_ASM51824v1      |
| GCA_000316195.1    | <i>Brachyspira hampsonii</i>      |                  | 30446 Scaffold  | 3.037     | 27.6 | ftp://ftp.ncbi.nlm.nih.gov/genomes/all/GCA/000/316/195/GCA_000316195.1_ASM31619v1      |
| GCA_000334935.1    | <i>Brachyspira hampsonii</i>      |                  | 30599 Contig    | 2.943     | 27.8 | ftp://ftp.ncbi.nlm.nih.gov/genomes/all/GCA/000/334/935/GCA_000334935.1_brachy30599_1.0 |
| GCA_001746225.1    | <i>Brachyspira hampsonii</i>      | NSH-16           | Contig          | 3.161     | 27.4 | ftp://ftp.ncbi.nlm.nih.gov/genomes/all/GCA/001/746/225/GCA_001746225.1_ASM174622v1     |
| GCA_001746215.1    | <i>Brachyspira hampsonii</i>      | NSH-24           | Contig          | 2.969     | 27.5 | ftp://ftp.ncbi.nlm.nih.gov/genomes/all/GCA/001/746/215/GCA_001746215.1_ASM174621v1     |
| GCA_001746205.1    | <i>Brachyspira hampsonii</i>      | P280/1           | Contig          | 3.187     | 27.5 | ftp://ftp.ncbi.nlm.nih.gov/genomes/all/GCA/001/746/205/GCA_001746205.1_ASM174620v1     |
| GCF_000022105.1    | <i>Brachyspira hyodysenteriae</i> | WA1; ATCC 49526  | Complete Genome | 3.037     | 27   | ftp://ftp.ncbi.nlm.nih.gov/genomes/all/GCF_000022105.1_ASM2210v1                       |
| GCA_001012935.1    | <i>Brachyspira hyodysenteriae</i> |                  | 865 Scaffold    | 3.010     | 27   | ftp://ftp.ncbi.nlm.nih.gov/genomes/all/GCF_001012935.1_ASM101293v1                     |
| GCF_000383255.1    | <i>Brachyspira hyodysenteriae</i> | ATCC 27164, B78  | Scaffold        | 3.050     | 27.1 | ftp://ftp.ncbi.nlm.nih.gov/genomes/all/GCF_000383255.1_ASM38325v1                      |
| GCA_001012915.1    | <i>Brachyspira hyodysenteriae</i> | FMV89.3323       | Scaffold        | 3.167     | 27   | ftp://ftp.ncbi.nlm.nih.gov/genomes/all/GCA/001/012/915/GCA_001012915.1_ASM101291v1     |
| GCF_001012925.1    | <i>Brachyspira hyodysenteriae</i> | NX               | Scaffold        | 3.014     | 27   | ftp://ftp.ncbi.nlm.nih.gov/genomes/all/GCA/001/012/925/GCA_001012925.1_ASM101292v1     |
| GCF_000384655.1    | <i>Brachyspira innocens</i>       | ATCC 29796, B256 | Contig          | 3.282     | 27.7 | ftp://ftp.ncbi.nlm.nih.gov/genomes/all/GCF_000384655.1_ASM38465v1                      |
| GCF_000223215.1    | <i>Brachyspira intermedia</i>     | PWS/A            | Complete Genome | 3.308     | 27.2 | ftp://ftp.ncbi.nlm.nih.gov/genomes/all/GCF_000223215.1_ASM22321v1                      |
| GCF_000092845.1    | <i>Brachyspira murdochii</i>      | DSM 12563        | Complete Genome | 3.242     | 27.8 | ftp://ftp.ncbi.nlm.nih.gov/genomes/all/GCF_000092845.1_ASM9284v1                       |
| GCF_000143725.1    | <i>Brachyspira pilosicoli</i>     | 95/1000          | Complete Genome | 2.586     | 27.9 | ftp://ftp.ncbi.nlm.nih.gov/genomes/all/GCF_000143725.1_ASM14372v1                      |
| GCF_000296575.1    | <i>Brachyspira pilosicoli</i>     | B2904            | Complete Genome | 2.765     | 27.8 | ftp://ftp.ncbi.nlm.nih.gov/genomes/all/GCF_000296575.1_ASM29657v1                      |
| GCF_000325665.1    | <i>Brachyspira pilosicoli</i>     | P43/6/78         | Complete Genome | 2.556     | 27.9 | ftp://ftp.ncbi.nlm.nih.gov/genomes/all/GCF_000325665.1_ASM32566v1                      |
| GCF_000319185.1    | <i>Brachyspira pilosicol</i>      | WesB             | Chromosome      | 2.890     | 27.9 | ftp://ftp.ncbi.nlm.nih.gov/genomes/all/GCF_000319185.1_ASM31918v1                      |
| GCF_001049755.1    | <i>Brachyspira suanatina</i>      | AN4859/03        | Contig          | 3.258     | 27   | ftp://ftp.ncbi.nlm.nih.gov/genomes/all/GCA/001/049/755/GCA_001049755.1_BRSU_AN4859_03  |
| GCA_000431595.1    | <i>Brachyspira sp.</i>            | CAG:700          | Scaffold        | 2.458     | 28.2 | ftp://ftp.ncbi.nlm.nih.gov/genomes/all/GCA/000/431/595/GCA_000431595.1_MGS700          |
| GCA_002379365.1    | <i>Brachyspira sp.</i>            | G79              | Scaffold        | 3.285     | 29.3 | ftp://ftp.ncbi.nlm.nih.gov/genomes/all/GCA/002/379/365/GCA_002379365.1_ASM237936v1     |

**Supplementary table 2. 16S sequences included as references**

| Accession number | Species                                 | Name           | 16S type         | Reference                     |
|------------------|-----------------------------------------|----------------|------------------|-------------------------------|
| gb AY187061.1    | Uncultured <i>Brachyspira sp.</i> clone | Zoo28          | partial sequence | Mikosza et. al <sup>1</sup>   |
| gb AY187060.1    | Uncultured <i>Brachyspira sp.</i> clone | Zoo18          | partial sequence | Mikosza et. al <sup>1</sup>   |
| gb AY187059.1    | <i>Brachyspira sp.</i>                  | Zoo17          | partial sequence | Mikosza et. al <sup>1</sup>   |
| gb AY187058.1    | <i>Brachyspira sp.</i>                  | Zoo12          | partial sequence | Mikosza et. al <sup>1</sup>   |
| gb AY187057.1    | <i>Brachyspira pilosicoli</i>           | OmanN26        | partial sequence | Mikosza et. al <sup>1</sup>   |
| gb AY187056.1    | Uncultured <i>Brachyspira sp.</i> clone | juhucaemu_Vic5 | partial sequence | Mikosza et. al <sup>1</sup>   |
| gb AY187055.1    | Uncultured <i>Brachyspira sp.</i> clone | adhucolmu_WA3  | partial sequence | Mikosza et. al <sup>1</sup>   |
| gb AY187054.1    | Uncultured <i>Brachyspira sp.</i> clone | adhucolmu_NT5  | partial sequence | Mikosza et. al <sup>1</sup>   |
| gb AY187053.1    | Uncultured <i>Brachyspira sp.</i> clone | adhucaemu_NT4  | partial sequence | Mikosza et. al <sup>1</sup>   |
| gb AY187052.1    | Uncultured <i>Brachyspira sp.</i> clone | adhucolmu_NT3  | partial sequence | Mikosza et. al <sup>1</sup>   |
| gb AY187051.1    | Uncultured <i>Brachyspira sp.</i> clone | juhuappmu_NT1  | partial sequence | Mikosza et. al <sup>1</sup>   |
| gb AY187050.1    | Uncultured <i>Brachyspira sp.</i> clone | adhucolmu_Fr6  | partial sequence | Mikosza et. al <sup>1</sup>   |
| gb JX446555.1    | <i>Brachyspira pilosicoli</i> clone     | Patient_41b    | partial sequence | Westerman et. al <sup>2</sup> |
| gb JX446554.1    | <i>Brachyspira aalborgi</i> clone       | Patient_41a    | partial sequence | Westerman et. al <sup>2</sup> |
| gb JX446548.1    | <i>Brachyspira aalborgi</i> clone       | Patient_36IIb  | partial sequence | Westerman et. al <sup>2</sup> |
| gb JX446547.1    | <i>Brachyspira pilosicoli</i> clone     | Patient_36IIa  | partial sequence | Westerman et. al <sup>2</sup> |
| gb JX446545.1    | <i>Brachyspira aalborgi</i> clone       | Patient_36Ia   | partial sequence | Westerman et. al <sup>2</sup> |
| gb JX446543.1    | <i>Brachyspira aalborgi</i> clone       | Patient_35IIa  | partial sequence | Westerman et. al <sup>2</sup> |
| gb JX446541.1    | <i>Brachyspira aalborgi</i> clone       | Patient_35Ia   | partial sequence | Westerman et. al <sup>2</sup> |
| gb JX446530.1    | <i>Brachyspira pilosicoli</i> clone     | Patient_26a    | partial sequence | Westerman et. al <sup>2</sup> |
| gb JX446522.1    | <i>Brachyspira aalborgi</i> clone       | Patient_19a    | partial sequence | Westerman et. al <sup>2</sup> |
| gb JX446519.1    | <i>Brachyspira aalborgi</i> clone       | Patient_17a    | partial sequence | Westerman et. al <sup>2</sup> |
| gb JX446516.1    | <i>Brachyspira aalborgi</i> clone       | Patient_15a    | partial sequence | Westerman et. al <sup>2</sup> |
| gb JX446504.1    | <i>Brachyspira aalborgi</i> clone       | Patient_7Ia    | partial sequence | Westerman et. al <sup>2</sup> |
| gb JX446571.1    | <i>Brachyspira aalborgi</i> clone       | Patient_56     | partial sequence | Westerman et. al <sup>2</sup> |
| gb JX446570.1    | <i>Brachyspira aalborgi</i> clone       | Patient_55     | partial sequence | Westerman et. al <sup>2</sup> |
| gb JX446569.1    | <i>Brachyspira aalborgi</i> clone       | Patient_54     | partial sequence | Westerman et. al <sup>2</sup> |
| gb JX446568.1    | <i>Brachyspira aalborgi</i> clone       | Patient_53     | partial sequence | Westerman et. al <sup>2</sup> |
| gb JX446567.1    | <i>Brachyspira aalborgi</i> clone       | Patient_52     | partial sequence | Westerman et. al <sup>2</sup> |
| gb JX446566.1    | <i>Brachyspira aalborgi</i> clone       | Patient_51     | partial sequence | Westerman et. al <sup>2</sup> |
| gb JX446565.1    | Uncultured <i>Brachyspira sp.</i> clone | Patient_50     | partial sequence | Westerman et. al <sup>2</sup> |
| gb JX446564.1    | <i>Brachyspira aalborgi</i> clone       | Patient_49     | partial sequence | Westerman et. al <sup>2</sup> |
| gb JX446563.1    | <i>Brachyspira aalborgi</i> clone       | Patient_48     | partial sequence | Westerman et. al <sup>2</sup> |
| gb JX446562.1    | <i>Brachyspira aalborgi</i> clone       | Patient_47     | partial sequence | Westerman et. al <sup>2</sup> |
| gb JX446561.1    | <i>Brachyspira aalborgi</i> clone       | Patient_46     | partial sequence | Westerman et. al <sup>2</sup> |
| gb JX446560.1    | <i>Brachyspira aalborgi</i> clone       | Patient_45     | partial sequence | Westerman et. al <sup>2</sup> |
| gb JX446559.1    | Uncultured <i>Brachyspira sp.</i> clone | Patient_44     | partial sequence | Westerman et. al <sup>2</sup> |
| gb JX446558.1    | <i>Brachyspira aalborgi</i> clone       | Patient_43     | partial sequence | Westerman et. al <sup>2</sup> |
| gb JX446557.1    | <i>Brachyspira aalborgi</i> clone       | Patient_42     | partial sequence | Westerman et. al <sup>2</sup> |
| gb JX446556.1    | Uncultured <i>Brachyspira sp.</i> clone | Patient_41c    | partial sequence | Westerman et. al <sup>2</sup> |
| gb JX446553.1    | <i>Brachyspira aalborgi</i> clone       | Patient_40     | partial sequence | Westerman et. al <sup>2</sup> |
| gb JX446552.1    | <i>Brachyspira aalborgi</i> clone       | Patient_39     | partial sequence | Westerman et. al <sup>2</sup> |
| gb JX446551.1    | <i>Brachyspira aalborgi</i> clone       | Patient_38     | partial sequence | Westerman et. al <sup>2</sup> |
| gb JX446550.1    | <i>Brachyspira aalborgi</i> clone       | Patient_37     | partial sequence | Westerman et. al <sup>2</sup> |
| gb JX446549.1    | Uncultured <i>Brachyspira sp.</i> clone | Patient_36IIc  | partial sequence | Westerman et. al <sup>2</sup> |
| gb JX446546.1    | Uncultured <i>Brachyspira sp.</i> clone | Patient_36Ib   | partial sequence | Westerman et. al <sup>2</sup> |
| gb JX446544.1    | Uncultured <i>Brachyspira sp.</i> clone | Patient_35IIb  | partial sequence | Westerman et. al <sup>2</sup> |
| gb JX446542.1    | Uncultured <i>Brachyspira sp.</i> clone | Patient_35Ib   | partial sequence | Westerman et. al <sup>2</sup> |
| gb JX446540.1    | <i>Brachyspira aalborgi</i> clone       | Patient_34     | partial sequence | Westerman et. al <sup>2</sup> |

**Supplementary table 2. 16S sequences included as references - page 2**

| Accession number | Species                                 | Name             | 16S type         | Reference                      |
|------------------|-----------------------------------------|------------------|------------------|--------------------------------|
| gb JX446539.1    | <i>Brachyspira aalborgi</i> clone       | Patient_33       | partial sequence | Westerman et. al <sup>2</sup>  |
| gb JX446538.1    | <i>Brachyspira aalborgi</i> clone       | Patient_32       | partial sequence | Westerman et. al <sup>2</sup>  |
| gb JX446537.1    | <i>Brachyspira pilosicoli</i> clone     | Patient_31       | partial sequence | Westerman et. al <sup>2</sup>  |
| gb JX446536.1    | <i>Brachyspira aalborgi</i> clone       | Patient_30II     | partial sequence | Westerman et. al <sup>2</sup>  |
| gb JX446535.1    | <i>Brachyspira aalborgi</i> clone       | Patient_30I      | partial sequence | Westerman et. al <sup>2</sup>  |
| gb JX446534.1    | <i>Brachyspira pilosicoli</i> clone     | Patient_29       | partial sequence | Westerman et. al <sup>2</sup>  |
| gb JX446533.1    | <i>Brachyspira aalborgi</i> clone       | Patient_28       | partial sequence | Westerman et. al <sup>2</sup>  |
| gb JX446532.1    | Uncultured <i>Brachyspira sp.</i> clone | Patient_27       | partial sequence | Westerman et. al <sup>2</sup>  |
| gb JX446531.1    | Uncultured <i>Brachyspira sp.</i> clone | Patient_26b      | partial sequence | Westerman et. al <sup>2</sup>  |
| gb JX446529.1    | <i>Brachyspira aalborgi</i> clone       | Patient_25       | partial sequence | Westerman et. al <sup>2</sup>  |
| gb JX446528.1    | <i>Brachyspira aalborgi</i> clone       | Patient_24       | partial sequence | Westerman et. al <sup>2</sup>  |
| gb JX446527.1    | <i>Brachyspira pilosicoli</i> clone     | Patient_23       | partial sequence | Westerman et. al <sup>2</sup>  |
| gb JX446526.1    | Uncultured <i>Brachyspira sp.</i> clone | Patient_22       | partial sequence | Westerman et. al <sup>2</sup>  |
| gb JX446525.1    | <i>Brachyspira aalborgi</i> clone       | Patient_21       | partial sequence | Westerman et. al <sup>2</sup>  |
| gb JX446524.1    | <i>Brachyspira pilosicoli</i> clone     | Patient_20       | partial sequence | Westerman et. al <sup>2</sup>  |
| gb JX446523.1    | Uncultured <i>Brachyspira sp.</i> clone | Patient_19b      | partial sequence | Westerman et. al <sup>2</sup>  |
| gb JX446521.1    | <i>Brachyspira aalborgi</i> clone       | Patient_18       | partial sequence | Westerman et. al <sup>2</sup>  |
| gb JX446520.1    | Uncultured <i>Brachyspira sp.</i> clone | Patient_17b      | partial sequence | Westerman et. al <sup>2</sup>  |
| gb JX446518.1    | Uncultured <i>Brachyspira sp.</i> clone | Patient_16       | partial sequence | Westerman et. al <sup>2</sup>  |
| gb JX446517.1    | Uncultured <i>Brachyspira sp.</i> clone | Patient_15b      | partial sequence | Westerman et. al <sup>2</sup>  |
| gb JX446515.1    | Uncultured <i>Brachyspira sp.</i> clone | Patient_14       | partial sequence | Westerman et. al <sup>2</sup>  |
| gb JX446514.1    | <i>Brachyspira aalborgi</i> clone       | Patient_13       | partial sequence | Westerman et. al <sup>2</sup>  |
| gb JX446513.1    | <i>Brachyspira aalborgi</i> clone       | Patient_12       | partial sequence | Westerman et. al <sup>2</sup>  |
| gb JX446512.1    | <i>Brachyspira aalborgi</i> clone       | Patient_11       | partial sequence | Westerman et. al <sup>2</sup>  |
| gb JX446511.1    | <i>Brachyspira aalborgi</i> clone       | Patient_10       | partial sequence | Westerman et. al <sup>2</sup>  |
| gb JX446510.1    | <i>Brachyspira aalborgi</i> clone       | Patient_9II      | partial sequence | Westerman et. al <sup>2</sup>  |
| gb JX446509.1    | <i>Brachyspira aalborgi</i> clone       | Patient_9I       | partial sequence | Westerman et. al <sup>2</sup>  |
| gb JX446508.1    | <i>Brachyspira aalborgi</i> clone       | Patient_8        | partial sequence | Westerman et. al <sup>2</sup>  |
| gb JX446507.1    | <i>Brachyspira aalborgi</i> clone       | Patient_7III     | partial sequence | Westerman et. al <sup>2</sup>  |
| gb JX446506.1    | <i>Brachyspira aalborgi</i> clone       | Patient_7II      | partial sequence | Westerman et. al <sup>2</sup>  |
| gb JX446505.1    | Uncultured <i>Brachyspira sp.</i> clone | Patient_7Ib      | partial sequence | Westerman et. al <sup>2</sup>  |
| gb JX446503.1    | <i>Brachyspira pilosicoli</i> clone     | Patient_6III     | partial sequence | Westerman et. al <sup>2</sup>  |
| gb JX446502.1    | <i>Brachyspira pilosicoli</i> clone     | Patient_6I       | partial sequence | Westerman et. al <sup>2</sup>  |
| gb JX446501.1    | <i>Brachyspira aalborgi</i> clone       | Patient_5        | partial sequence | Westerman et. al <sup>2</sup>  |
| gb JX446500.1    | <i>Brachyspira aalborgi</i> clone       | Patient_4        | partial sequence | Westerman et. al <sup>2</sup>  |
| gb JX446499.1    | <i>Brachyspira pilosicoli</i> clone     | Patient_3        | partial sequence | Westerman et. al <sup>2</sup>  |
| gb JX446498.1    | <i>Brachyspira aalborgi</i> clone       | Patient_2        | partial sequence | Westerman et. al <sup>2</sup>  |
| gb JX446497.1    | <i>Brachyspira aalborgi</i> clone       | Patient_1        | partial sequence | Westerman et. al <sup>2</sup>  |
| gb JX463024.1    | Uncultured <i>Brachyspira sp.</i> clone | Apndx_occ_141    | partial sequence | Westerman et. al <sup>2</sup>  |
| gb JX463023.1    | Uncultured <i>Brachyspira sp.</i> clone | Apndx_occ_131    | partial sequence | Westerman et. al <sup>2</sup>  |
| gb JX463022.1    | Uncultured <i>Brachyspira sp.</i> clone | Ps_apndx_acc_113 | partial sequence | Westerman et. al <sup>2</sup>  |
| gb JX463021.1    | Uncultured <i>Brachyspira sp.</i> clone | Ps_apndx_acc_111 | partial sequence | Westerman et. al <sup>2</sup>  |
| gb JX463020.1    | Uncultured <i>Brachyspira sp.</i> clone | Apndx_Acc_57     | partial sequence | Westerman et. al <sup>2</sup>  |
| gb AF200693.1    | <i>Brachyspira aalborgi</i> strain W1   | W1               | partial sequence | Pettersson et. al <sup>3</sup> |
| gb AF228822.1    | Uncultured bacterium                    | adhucomu_Tvb72   | partial sequence | Pettersson et. al <sup>3</sup> |
| gb AF228821.1    | Uncultured bacterium                    | adhucomu_Tvb40   | partial sequence | Pettersson et. al <sup>3</sup> |
| gb AF228820.1    | Uncultured bacterium                    | adhucomu_Tvb21   | partial sequence | Pettersson et. al <sup>3</sup> |
| gb AF228819.1    | Uncultured bacterium                    | adhucomu_Tvb03   | partial sequence | Pettersson et. al <sup>3</sup> |
| gb AF228818.1    | Uncultured bacterium                    | adhucomu_Tva35   | partial sequence | Pettersson et. al <sup>3</sup> |

**Supplementary table 2. 16S sequences included as references - page 3**

| Accession number | Species                       | Name           | 16S type          | Reference                      |
|------------------|-------------------------------|----------------|-------------------|--------------------------------|
| gb AF228817.1    | Uncultured bacterium          | adhucomu_Tva17 | partial sequence  | Pettersson et. al <sup>3</sup> |
| gb AF228816.1    | Uncultured bacterium          | adhucomu_Hcc39 | partial sequence  | Pettersson et. al <sup>3</sup> |
| gb AF228815.1    | Uncultured bacterium          | adhucomu_Hcc36 | partial sequence  | Pettersson et. al <sup>3</sup> |
| gb AF228814.1    | Uncultured bacterium          | adhucomu_Hcc35 | partial sequence  | Pettersson et. al <sup>3</sup> |
| gb AF228813.1    | Uncultured bacterium          | adhucomu_Hcc33 | partial sequence  | Pettersson et. al <sup>3</sup> |
| gb AF228812.1    | Uncultured bacterium          | adhucomu_Hcc07 | partial sequence  | Pettersson et. al <sup>3</sup> |
| gb AF228811.1    | Uncultured bacterium          | adhucomu_Hca76 | partial sequence  | Pettersson et. al <sup>3</sup> |
| gb AF228810.1    | Uncultured bacterium          | adhucomu_Hca61 | partial sequence  | Pettersson et. al <sup>3</sup> |
| gb AF228809.1    | Uncultured bacterium          | adhucomu_Hca41 | partial sequence  | Pettersson et. al <sup>3</sup> |
| gb AF228808.1    | Uncultured bacterium          | adhucomu_Hca25 | partial sequence  | Pettersson et. al <sup>3</sup> |
| gb AF228807.1    | Uncultured bacterium          | adhucomu_Hca20 | partial sequence  | Pettersson et. al <sup>3</sup> |
| gb AF228806.1    | Uncultured bacterium          | adhucomu_Hca09 | partial sequence  | Pettersson et. al <sup>3</sup> |
| CAYT010000179    | <i>Brachyspira sp.</i>        | CAG700         | partial sequence  | SILVA database <sup>4</sup>    |
| HE793032         | <i>Brachyspira pilosicoli</i> | WesB           | complete sequence | SILVA database <sup>4</sup>    |
| CP002025         | <i>Brachyspira pilosicoli</i> | 95/1000        | complete sequence | SILVA database <sup>4</sup>    |
| CP002873         | <i>Brachyspira pilosicoli</i> | P43/6/78       | partial sequence  | SILVA database <sup>4</sup>    |
| CP003490         | <i>Brachyspira pilosicoli</i> | B2904          | partial sequence  | SILVA database <sup>4</sup>    |

<sup>1</sup> Mikosza AS et. al: **Analysis of genetic variation in *Brachyspira aalborgi* and related spirochaetes determined by partial sequencing of the 16S rRNA and NADH oxidase genes.** *J Med Microbiol* 2004, **53**:333-339.

<sup>2</sup> Westerman LJ et. al: **Development of a real-time PCR for identification of *brachyspira* species in human colonic biopsies.** *PLoS One* 2012, **7**:e52281.

<sup>3</sup> Pettersson B et. al: **Phylogenetic evidence for novel and genetically different intestinal spirochetes resembling *Brachyspira aalborgi* in the mucosa of the human colon as revealed by 16S rDNA analysis.** *Syst Appl Microbiol* 2000, **23**:355-363.

<sup>4</sup> SILVA database, <https://www.arb-silva.de/>

Supplementary table 3. NADH oxidase (*nox*) sequences included as references

| Accession number | Species                           | Strain/isolate           | Description                                   |
|------------------|-----------------------------------|--------------------------|-----------------------------------------------|
| AF060816.1       | <i>Brachyspira aalborgi</i>       | ATCC 43994               | NADH oxidase gene, partial cds                |
| KF386072.1       | <i>Brachyspira alvinipulli</i>    | AIS154                   | NADH oxidase ( <i>nox</i> ) gene, partial cds |
| KF386076.1       | <i>Brachyspira alvinipulli</i>    | AIS163                   | NADH oxidase ( <i>nox</i> ) gene, partial cds |
| KF386053.1       | <i>Brachyspira alvinipulli</i>    | AIS47                    | NADH oxidase ( <i>nox</i> ) gene, partial cds |
| KF386057.1       | <i>Brachyspira alvinipulli</i>    | AIS59                    | NADH oxidase ( <i>nox</i> ) gene, partial cds |
| KF386058.1       | <i>Brachyspira alvinipulli</i>    | AIS60                    | NADH oxidase ( <i>nox</i> ) gene, partial cds |
| KF386067.1       | <i>Brachyspira alvinipulli</i>    | AIS80                    | NADH oxidase ( <i>nox</i> ) gene, partial cds |
| JF430770.1       | <i>Brachyspira alvinipulli</i>    | AN3382/2/03              | NADH oxidase ( <i>nox</i> ) gene, partial cds |
| JF430742.1       | <i>Brachyspira alvinipulli</i>    | AN3649/1/02              | NADH oxidase ( <i>nox</i> ) gene, partial cds |
| JF430746.1       | <i>Brachyspira alvinipulli</i>    | AN3649/3b/02             | NADH oxidase ( <i>nox</i> ) gene, partial cds |
| JF430743.1       | <i>Brachyspira alvinipulli</i>    | AN3933/1/02              | NADH oxidase ( <i>nox</i> ) gene, partial cds |
| JF430747.1       | <i>Brachyspira alvinipulli</i>    | AN3940/1/02              | NADH oxidase ( <i>nox</i> ) gene, partial cds |
| JF430771.1       | <i>Brachyspira alvinipulli</i>    | AN4578/01                | NADH oxidase ( <i>nox</i> ) gene, partial cds |
| JF430744.1       | <i>Brachyspira alvinipulli</i>    | AN6041:1/1/00            | NADH oxidase ( <i>nox</i> ) gene, partial cds |
| JF430745.1       | <i>Brachyspira alvinipulli</i>    | AN6050:2/3/00            | NADH oxidase ( <i>nox</i> ) gene, partial cds |
| KR809396.1       | <i>Brachyspira alvinipulli</i>    | Ant10:1/1/09             | NADH oxidase ( <i>nox</i> ) gene, partial cds |
| KR809403.1       | <i>Brachyspira alvinipulli</i>    | Ant226/3/12              | NADH oxidase ( <i>nox</i> ) gene, partial cds |
| KR809404.1       | <i>Brachyspira alvinipulli</i>    | Ant230/3/12              | NADH oxidase ( <i>nox</i> ) gene, partial cds |
| AF060814.1       | <i>Brachyspira alvinipulli</i>    | C1                       | NADH oxidase gene, partial cds                |
| EU819071.1       | <i>Brachyspira canis</i>          | Dog A2                   | NADH oxidase ( <i>nox</i> ) gene, partial cds |
| KT381866.1       | <i>Brachyspira canis</i>          | RSG01                    | NADH oxidase gene, partial cds                |
| KT381867.1       | <i>Brachyspira canis</i>          | RSG02                    | NADH oxidase gene, partial cds                |
| KT381868.1       | <i>Brachyspira canis</i>          | RSG03                    | NADH oxidase gene, partial cds                |
| KT381869.1       | <i>Brachyspira canis</i>          | RSG05                    | NADH oxidase gene, partial cds                |
| EF436590.1       | <i>Brachyspira canis</i>          | SRBP205IR                | NADH oxidase ( <i>nox</i> ) gene, partial cds |
| EU819072.1       | <i>Brachyspira corvi</i>          | AN1084/1/04              | NADH oxidase ( <i>nox</i> ) gene, partial cds |
| EU819073.1       | <i>Brachyspira corvi</i>          | AN1865/1/04              | NADH oxidase ( <i>nox</i> ) gene, partial cds |
| EU819074.1       | <i>Brachyspira corvi</i>          | AN1876/2/04              | NADH oxidase ( <i>nox</i> ) gene, partial cds |
| EU819075.1       | <i>Brachyspira corvi</i>          | AN968/2/04               | NADH oxidase ( <i>nox</i> ) gene, partial cds |
| KU215621.1       | <i>Brachyspira hyodysenteriae</i> | 49                       | NADH oxidase ( <i>nox</i> ) gene, partial cds |
| JX428806.1       | <i>Brachyspira hyodysenteriae</i> | 3140                     | NADH oxidase ( <i>nox</i> ) gene, partial cds |
| DQ487115.1       | <i>Brachyspira hyodysenteriae</i> | AN 1409:2/01             | NADH oxidase ( <i>nox</i> ) gene, partial cds |
| DQ487117.1       | <i>Brachyspira hyodysenteriae</i> | AN 174/92                | NADH oxidase ( <i>nox</i> ) gene, partial cds |
| DQ487118.1       | <i>Brachyspira hyodysenteriae</i> | AN 2420/97               | NADH oxidase ( <i>nox</i> ) gene, partial cds |
| DQ487116.1       | <i>Brachyspira hyodysenteriae</i> | AN 383:2/00              | NADH oxidase ( <i>nox</i> ) gene, partial cds |
| KC984311.1       | <i>Brachyspira hyodysenteriae</i> | ATCC 27164               | NADH oxidase ( <i>nox</i> ) gene, partial cds |
| KF680564.1       | <i>Brachyspira hyodysenteriae</i> | B16                      | <i>nox</i> gene, partial sequence UNVERIFIED  |
| AF060801.1       | <i>Brachyspira hyodysenteriae</i> | B169                     | NADH oxidase gene, partial cds                |
| KF680565.1       | <i>Brachyspira hyodysenteriae</i> | B24                      | <i>nox</i> gene, partial sequence UNVERIFIED  |
| KF680573.1       | <i>Brachyspira hyodysenteriae</i> | B51                      | <i>nox</i> gene, partial sequence UNVERIFIED  |
| KF680574.1       | <i>Brachyspira hyodysenteriae</i> | B53                      | <i>nox</i> gene, partial sequence UNVERIFIED  |
| KF680575.1       | <i>Brachyspira hyodysenteriae</i> | B60                      | <i>nox</i> gene, partial sequence UNVERIFIED  |
| AF060800.1       | <i>Brachyspira hyodysenteriae</i> | B78                      | NADH oxidase gene, partial cds                |
| KF680580.1       | <i>Brachyspira hyodysenteriae</i> | B81                      | <i>nox</i> gene, partial sequence UNVERIFIED  |
| AF060802.1       | <i>Brachyspira hyodysenteriae</i> | R1                       | NADH oxidase gene, partial cds                |
| HM462461.1       | <i>Brachyspira hyodysenteriae</i> |                          | NADH oxidase ( <i>nox</i> ) gene, partial cds |
| AF060810.1       | <i>Brachyspira intermedia</i>     | 2818.5                   | NADH oxidase gene, partial cds                |
| AF060812.1       | <i>Brachyspira intermedia</i>     | 4482                     | NADH oxidase gene, partial cds                |
| AH015259.2       | <i>Brachyspira intermedia</i>     | 1296/02                  | NADH oxidase ( <i>nox</i> ) gene, partial cds |
| JF430736.1       | <i>Brachyspira intermedia</i>     | AN3649/7b/02             | NADH oxidase ( <i>nox</i> ) gene, partial cds |
| JF430737.1       | <i>Brachyspira intermedia</i>     | AN3651/1b/02             | NADH oxidase ( <i>nox</i> ) gene, partial cds |
| JF430738.1       | <i>Brachyspira intermedia</i>     | AN3651/2b/02             | NADH oxidase ( <i>nox</i> ) gene, partial cds |
| EF517542.1       | <i>Brachyspira intermedia</i>     | AN519/97                 | <i>nox</i> ( <i>nox</i> ) gene, partial cds   |
| EF517543.1       | <i>Brachyspira intermedia</i>     | AN983/90                 | <i>nox</i> gene, partial sequence             |
| KR809402.1       | <i>Brachyspira intermedia</i>     | Ant226/1/12              | NADH oxidase ( <i>nox</i> ) gene, partial cds |
| KF680562.1       | <i>Brachyspira intermedia</i>     | B113                     | <i>nox</i> gene, partial sequence UNVERIFIED  |
| KF680566.1       | <i>Brachyspira intermedia</i>     | B25                      | <i>nox</i> gene, partial sequence UNVERIFIED  |
| KF680576.1       | <i>Brachyspira intermedia</i>     | B67                      | <i>nox</i> gene, partial sequence UNVERIFIED  |
| KF680577.1       | <i>Brachyspira intermedia</i>     | B69                      | <i>nox</i> gene, partial sequence UNVERIFIED  |
| MF116417.1       | <i>Brachyspira intermedia</i>     | JB1                      | NADH oxidase ( <i>nox</i> ) gene, partial cds |
| AF060811.1       | <i>Brachyspira intermedia</i>     | PWS/A                    | NADH oxidase gene, partial cds                |
| CP002874.1       | <i>Brachyspira intermedia</i>     | PWS/A                    | complete genome                               |
| KC984309.1       | <i>Brachyspira intermedia</i>     | PWS/A, strain ATCC 51140 | NADH oxidase ( <i>nox</i> ) gene, partial cds |
| KY216078.1       | <i>Brachyspira intermedia</i>     | T1.6                     | NADH oxidase ( <i>nox</i> ) gene, partial cds |
| KY216086.1       | <i>Brachyspira intermedia</i>     | T9.4                     | NADH oxidase ( <i>nox</i> ) gene, partial cds |
| KY216087.1       | <i>Brachyspira intermedia</i>     | T9.5                     | NADH oxidase ( <i>nox</i> ) gene, partial cds |
| JX428829.1       | <i>Brachyspira intermedia</i>     | X26                      | NADH oxidase ( <i>nox</i> ) gene, partial cds |
| JX428825.1       | <i>Brachyspira intermedia</i>     | X31                      | NADH oxidase ( <i>nox</i> ) gene, partial cds |
| JX428826.1       | <i>Brachyspira intermedia</i>     | X45                      | NADH oxidase ( <i>nox</i> ) gene, partial cds |
| JX428828.1       | <i>Brachyspira intermedia</i>     | X53                      | NADH oxidase ( <i>nox</i> ) gene, partial cds |

Supplementary table 3. NADH oxidase (*nox*) sequences included as references - page 2

| Accession number | Species                       | Strain/isolate | Description                                   |
|------------------|-------------------------------|----------------|-----------------------------------------------|
| JX428827.1       | <i>Brachyspira intermedia</i> | XCL2           | NADH oxidase ( <i>nox</i> ) gene, partial cds |
| DQ458796.1       | <i>Brachyspira intermedia</i> |                | NADH oxidase ( <i>nox</i> ) gene, partial cds |
| JF430769.1       | <i>Brachyspira pulli</i>      | AN304/04       | NADH oxidase ( <i>nox</i> ) gene, partial cds |
| JF430741.1       | <i>Brachyspira pulli</i>      | AN3651/3b/02   | NADH oxidase ( <i>nox</i> ) gene, partial cds |
| JF430739.1       | <i>Brachyspira pulli</i>      | AN6045/1/00    | NADH oxidase ( <i>nox</i> ) gene, partial cds |
| JF430740.1       | <i>Brachyspira pulli</i>      | AN6052:2/1/00  | NADH oxidase ( <i>nox</i> ) gene, partial cds |
| KR809397.1       | <i>Brachyspira pulli</i>      | Ant10:1/2/09   | NADH oxidase ( <i>nox</i> ) gene, partial cds |
| KR809401.1       | <i>Brachyspira pulli</i>      | Ant25:2/1/09   | NADH oxidase ( <i>nox</i> ) gene, partial cds |
| JX428824.1       | <i>Brachyspira pulli</i>      | H48            | NADH oxidase ( <i>nox</i> ) gene, partial cds |
| MF116419.1       | <i>Brachyspira pulli</i>      | JB2            | NADH oxidase ( <i>nox</i> ) gene, partial cds |
| KY216084.1       | <i>Brachyspira pulli</i>      | T7.5           | NADH oxidase ( <i>nox</i> ) gene, partial cds |
| KY216085.1       | <i>Brachyspira pulli</i>      | T8.5           | NADH oxidase ( <i>nox</i> ) gene, partial cds |
| KY216091.1       | <i>Brachyspira pulli</i>      | W1.5           | NADH oxidase ( <i>nox</i> ) gene, partial cds |
| KY216102.1       | <i>Brachyspira pulli</i>      | W4.2           | NADH oxidase ( <i>nox</i> ) gene, partial cds |
| KY216103.1       | <i>Brachyspira pulli</i>      | W4.3           | NADH oxidase ( <i>nox</i> ) gene, partial cds |
| HM462456.1       | <i>Brachyspira sp.</i>        | 9757/1         | NADH oxidase ( <i>nox</i> ) gene, partial cds |
| HM462458.1       | <i>Brachyspira sp.</i>        | 10363/4        | NADH oxidase ( <i>nox</i> ) gene, partial cds |
| HM462459.1       | <i>Brachyspira sp.</i>        | 21330/2        | NADH oxidase ( <i>nox</i> ) gene, partial cds |
| HM462462.1       | <i>Brachyspira sp.</i>        | 24916/1        | NADH oxidase ( <i>nox</i> ) gene, partial cds |
| KC561393.1       | <i>Brachyspira sp.</i>        | A22            | NADH oxidase gene, partial cds                |
| KC561379.1       | <i>Brachyspira sp.</i>        | A26            | NADH oxidase gene, partial cds                |
| KC561381.1       | <i>Brachyspira sp.</i>        | A27            | NADH oxidase gene, partial cds                |
| KC561391.1       | <i>Brachyspira sp.</i>        | A50            | NADH oxidase gene, partial cds                |
| KC561431.1       | <i>Brachyspira sp.</i>        | A55            | NADH oxidase gene, partial cds                |
| KC561392.1       | <i>Brachyspira sp.</i>        | A58            | NADH oxidase gene, partial cds                |
| KC561434.1       | <i>Brachyspira sp.</i>        | A59            | NADH oxidase gene, partial cds                |
| KC561427.1       | <i>Brachyspira sp.</i>        | A60            | NADH oxidase gene, partial cds                |
| KC561433.1       | <i>Brachyspira sp.</i>        | A61            | NADH oxidase gene, partial cds                |
| KC561398.1       | <i>Brachyspira sp.</i>        | A62            | NADH oxidase gene, partial cds                |
| KC561396.1       | <i>Brachyspira sp.</i>        | A63            | NADH oxidase gene, partial cds                |
| DQ487125.1       | <i>Brachyspira sp.</i>        | AN 3930:2/02   | NADH oxidase ( <i>nox</i> ) gene, partial cds |
| JF430768.1       | <i>Brachyspira sp.</i>        | AN3442/1/02    | NADH oxidase ( <i>nox</i> ) gene, partial cds |
| JF430758.1       | <i>Brachyspira sp.</i>        | AN3617:2/1/02  | NADH oxidase ( <i>nox</i> ) gene, partial cds |
| JF430735.1       | <i>Brachyspira sp.</i>        | AN3649/2b/02   | NADH oxidase ( <i>nox</i> ) gene, partial cds |
| JF430734.1       | <i>Brachyspira sp.</i>        | AN6043:2/1/00  | NADH oxidase ( <i>nox</i> ) gene, partial cds |
| KR809398.1       | <i>Brachyspira sp.</i>        | Ant10:2a/1/09  | NADH oxidase ( <i>nox</i> ) gene, partial cds |
| KR809395.1       | <i>Brachyspira sp.</i>        | Ant112/1/02    | NADH oxidase ( <i>nox</i> ) gene, partial cds |
| KR809399.1       | <i>Brachyspira sp.</i>        | Ant16/1/09     | NADH oxidase ( <i>nox</i> ) gene, partial cds |
| KR809405.1       | <i>Brachyspira sp.</i>        | Ant235/1/12    | NADH oxidase ( <i>nox</i> ) gene, partial cds |
| KR809406.1       | <i>Brachyspira sp.</i>        | Ant357/1/12    | NADH oxidase ( <i>nox</i> ) gene, partial cds |
| KC561424.1       | <i>Brachyspira sp.</i>        | B10            | NADH oxidase gene, partial cds                |
| KC561405.1       | <i>Brachyspira sp.</i>        | B31            | NADH oxidase gene, partial cds                |
| KC561428.1       | <i>Brachyspira sp.</i>        | B32            | NADH oxidase gene, partial cds                |
| KC561450.1       | <i>Brachyspira sp.</i>        | B34            | NADH oxidase gene, partial cds                |
| KC561387.1       | <i>Brachyspira sp.</i>        | B4             | NADH oxidase gene, partial cds                |
| KC561426.1       | <i>Brachyspira sp.</i>        | B56a           | NADH oxidase gene, partial cds                |
| KC561429.1       | <i>Brachyspira sp.</i>        | B56c           | NADH oxidase gene, partial cds                |
| KC561425.1       | <i>Brachyspira sp.</i>        | B57            | NADH oxidase gene, partial cds                |
| KC561401.1       | <i>Brachyspira sp.</i>        | B58            | NADH oxidase gene, partial cds                |
| KC561413.1       | <i>Brachyspira sp.</i>        | B60            | NADH oxidase gene, partial cds                |
| KC561411.1       | <i>Brachyspira sp.</i>        | B64            | NADH oxidase gene, partial cds                |
| KC561388.1       | <i>Brachyspira sp.</i>        | B66            | NADH oxidase gene, partial cds                |
| KC561395.1       | <i>Brachyspira sp.</i>        | B7             | NADH oxidase gene, partial cds                |
| KC561412.1       | <i>Brachyspira sp.</i>        | B70            | NADH oxidase gene, partial cds                |
| KC561422.1       | <i>Brachyspira sp.</i>        | B71            | NADH oxidase gene, partial cds                |
| KC561430.1       | <i>Brachyspira sp.</i>        | B78            | NADH oxidase gene, partial cds                |
| KC561373.1       | <i>Brachyspira sp.</i>        | C32            | NADH oxidase gene, partial cds                |
| KC561402.1       | <i>Brachyspira sp.</i>        | C35            | NADH oxidase gene, partial cds                |
| KC561435.1       | <i>Brachyspira sp.</i>        | C44            | NADH oxidase gene, partial cds                |
| KC561415.1       | <i>Brachyspira sp.</i>        | C47            | NADH oxidase gene, partial cds                |
| KC561407.1       | <i>Brachyspira sp.</i>        | C52            | NADH oxidase gene, partial cds                |
| KC561403.1       | <i>Brachyspira sp.</i>        | C61            | NADH oxidase gene, partial cds                |
| KC561437.1       | <i>Brachyspira sp.</i>        | C68            | NADH oxidase gene, partial cds                |
| KC561382.1       | <i>Brachyspira sp.</i>        | C72            | NADH oxidase gene, partial cds                |
| KC561442.1       | <i>Brachyspira sp.</i>        | C75            | NADH oxidase gene, partial cds                |
| KC878394.1       | <i>Brachyspira sp.</i>        | CH-003         | NADH oxidase ( <i>nox</i> ) gene, partial cds |
| KC878395.1       | <i>Brachyspira sp.</i>        | CH-013         | NADH oxidase ( <i>nox</i> ) gene, partial cds |
| KC878396.1       | <i>Brachyspira sp.</i>        | CH-014         | NADH oxidase ( <i>nox</i> ) gene, partial cds |
| KC878397.1       | <i>Brachyspira sp.</i>        | CH-108         | NADH oxidase ( <i>nox</i> ) gene, partial cds |
| KC878398.1       | <i>Brachyspira sp.</i>        | CH-110         | NADH oxidase ( <i>nox</i> ) gene, partial cds |

Supplementary table 3. NADH oxidase (*nox*) sequences included as references - page 3

| Accession number | Species                      | Strain/isolate | Description                                   |
|------------------|------------------------------|----------------|-----------------------------------------------|
| KC561383.1       | <i>Brachyspira</i> sp.       | D03            | NADH oxidase gene, partial cds                |
| KC561443.1       | <i>Brachyspira</i> sp.       | D08            | NADH oxidase gene, partial cds                |
| KC561389.1       | <i>Brachyspira</i> sp.       | D11            | NADH oxidase gene, partial cds                |
| KC561420.1       | <i>Brachyspira</i> sp.       | D61            | NADH oxidase gene, partial cds                |
| KC561408.1       | <i>Brachyspira</i> sp.       | D71            | NADH oxidase gene, partial cds                |
| KC561432.1       | <i>Brachyspira</i> sp.       | D75            | NADH oxidase gene, partial cds                |
| KC561451.1       | <i>Brachyspira</i> sp.       | D85            | NADH oxidase gene, partial cds                |
| KC561449.1       | <i>Brachyspira</i> sp.       | E35            | NADH oxidase gene, partial cds                |
| KC561421.1       | <i>Brachyspira</i> sp.       | E62            | NADH oxidase gene, partial cds                |
| KC561440.1       | <i>Brachyspira</i> sp.       | E75            | NADH oxidase gene, partial cds                |
| KC561445.1       | <i>Brachyspira</i> sp.       | F01            | NADH oxidase gene, partial cds                |
| KC561438.1       | <i>Brachyspira</i> sp.       | F07            | NADH oxidase gene, partial cds                |
| KC561439.1       | <i>Brachyspira</i> sp.       | F08            | NADH oxidase gene, partial cds                |
| KC561385.1       | <i>Brachyspira</i> sp.       | F21            | NADH oxidase gene, partial cds                |
| KC561423.1       | <i>Brachyspira</i> sp.       | F31            | NADH oxidase gene, partial cds                |
| KC561446.1       | <i>Brachyspira</i> sp.       | F32            | NADH oxidase gene, partial cds                |
| KC561447.1       | <i>Brachyspira</i> sp.       | F33            | NADH oxidase gene, partial cds                |
| KC561394.1       | <i>Brachyspira</i> sp.       | F52            | NADH oxidase gene, partial cds                |
| KC561400.1       | <i>Brachyspira</i> sp.       | F56            | NADH oxidase gene, partial cds                |
| KC561414.1       | <i>Brachyspira</i> sp.       | F62            | NADH oxidase gene, partial cds                |
| KC561416.1       | <i>Brachyspira</i> sp.       | F65            | NADH oxidase gene, partial cds                |
| KC561409.1       | <i>Brachyspira</i> sp.       | F66            | NADH oxidase gene, partial cds                |
| KC561406.1       | <i>Brachyspira</i> sp.       | F68            | NADH oxidase gene, partial cds                |
| KC561384.1       | <i>Brachyspira</i> sp.       | F73            | NADH oxidase gene, partial cds                |
| KC561444.1       | <i>Brachyspira</i> sp.       | F80            | NADH oxidase gene, partial cds                |
| KC561452.1       | <i>Brachyspira</i> sp.       | F83            | NADH oxidase gene, partial cds                |
| KC561441.1       | <i>Brachyspira</i> sp.       | F85            | NADH oxidase gene, partial cds                |
| KC561404.1       | <i>Brachyspira</i> sp.       | F87            | NADH oxidase gene, partial cds                |
| KC561378.1       | <i>Brachyspira</i> sp.       | G21            | NADH oxidase gene, partial cds                |
| KC561374.1       | <i>Brachyspira</i> sp.       | G26            | NADH oxidase gene, partial cds                |
| KC561419.1       | <i>Brachyspira</i> sp.       | G62            | NADH oxidase gene, partial cds                |
| KC561417.1       | <i>Brachyspira</i> sp.       | G63            | NADH oxidase gene, partial cds                |
| KC561399.1       | <i>Brachyspira</i> sp.       | G70            | NADH oxidase gene, partial cds                |
| KC561410.1       | <i>Brachyspira</i> sp.       | G81            | NADH oxidase gene, partial cds                |
| KC561453.1       | <i>Brachyspira</i> sp.       | GZZ            | NADH oxidase gene, partial cds                |
| JX428805.1       | <i>Brachyspira</i> sp.       | H29            | NADH oxidase ( <i>nox</i> ) gene, partial cds |
| KC561436.1       | <i>Brachyspira</i> sp.       | H45            | NADH oxidase gene, partial cds                |
| KC561418.1       | <i>Brachyspira</i> sp.       | H58            | NADH oxidase gene, partial cds                |
| KC561377.1       | <i>Brachyspira</i> sp.       | H73            | NADH oxidase gene, partial cds                |
| KC561376.1       | <i>Brachyspira</i> sp.       | H87            | NADH oxidase gene, partial cds                |
| KC561390.1       | <i>Brachyspira</i> sp.       | I12            | NADH oxidase gene, partial cds                |
| KC561448.1       | <i>Brachyspira</i> sp.       | I14            | NADH oxidase gene, partial cds                |
| KC561380.1       | <i>Brachyspira</i> sp.       | J11            | NADH oxidase gene, partial cds                |
| KC561375.1       | <i>Brachyspira</i> sp.       | J13            | NADH oxidase gene, partial cds                |
| KC561397.1       | <i>Brachyspira</i> sp.       | K07            | NADH oxidase gene, partial cds                |
| KC878399.1       | <i>Brachyspira</i> sp.       | KL-049         | NADH oxidase ( <i>nox</i> ) gene, partial cds |
| KC878400.1       | <i>Brachyspira</i> sp.       | KL-169         | NADH oxidase ( <i>nox</i> ) gene, partial cds |
| KC878402.1       | <i>Brachyspira</i> sp.       | KL-181         | NADH oxidase ( <i>nox</i> ) gene, partial cds |
| KC878403.1       | <i>Brachyspira</i> sp.       | KL-194         | NADH oxidase ( <i>nox</i> ) gene, partial cds |
| KC878404.1       | <i>Brachyspira</i> sp.       | KL-207         | NADH oxidase ( <i>nox</i> ) gene, partial cds |
| KC561386.1       | <i>Brachyspira</i> sp.       | L20            | NADH oxidase gene, partial cds                |
| JX232302.1       | <i>Brachyspira</i> sp.       | NSH-1          | NADH oxidase ( <i>nox</i> ) gene, partial cds |
| JX232322.1       | <i>Brachyspira</i> sp.       | NSH-28         | NADH oxidase ( <i>nox</i> ) gene, partial cds |
| JX232304.1       | <i>Brachyspira</i> sp.       | NSH-3          | NADH oxidase ( <i>nox</i> ) gene, partial cds |
| JX232324.1       | <i>Brachyspira</i> sp.       | NSH-30         | NADH oxidase ( <i>nox</i> ) gene, partial cds |
| JX232327.1       | <i>Brachyspira</i> sp.       | NSH-33         | NADH oxidase ( <i>nox</i> ) gene, partial cds |
| JX232328.1       | <i>Brachyspira</i> sp.       | NSH-34         | NADH oxidase ( <i>nox</i> ) gene, partial cds |
| JX232329.1       | <i>Brachyspira</i> sp.       | NSH-35         | NADH oxidase ( <i>nox</i> ) gene, partial cds |
| JX232331.1       | <i>Brachyspira</i> sp.       | NSH-37         | NADH oxidase ( <i>nox</i> ) gene, partial cds |
| JX232332.1       | <i>Brachyspira</i> sp.       | NSH-38         | NADH oxidase ( <i>nox</i> ) gene, partial cds |
| JX232333.1       | <i>Brachyspira</i> sp.       | NSH-39         | NADH oxidase ( <i>nox</i> ) gene, partial cds |
| JX232309.1       | <i>Brachyspira</i> sp.       | NSH-8          | NADH oxidase ( <i>nox</i> ) gene, partial cds |
| KC878405.1       | <i>Brachyspira</i> sp.       | SHI-031        | NADH oxidase ( <i>nox</i> ) gene, partial cds |
| KC878406.1       | <i>Brachyspira</i> sp.       | SHI-067        | NADH oxidase ( <i>nox</i> ) gene, partial cds |
| KC878407.1       | <i>Brachyspira</i> sp.       | SHI-068        | NADH oxidase ( <i>nox</i> ) gene, partial cds |
| KC878408.1       | <i>Brachyspira</i> sp.       | SHI-129        | NADH oxidase ( <i>nox</i> ) gene, partial cds |
| KY798219.1       | <i>Brachyspira suanatina</i> | 755-3x 17      | NADH oxidase ( <i>nox</i> ) gene, partial cds |
| DQ487124.1       | <i>Brachyspira suanatina</i> | AN 1418:2/01   | NADH oxidase ( <i>nox</i> ) gene, partial cds |
| DQ487120.1       | <i>Brachyspira suanatina</i> | AN 1681:1/04   | NADH oxidase ( <i>nox</i> ) gene, partial cds |
| DQ487121.1       | <i>Brachyspira suanatina</i> | AN 2384/04     | NADH oxidase ( <i>nox</i> ) gene, partial cds |

**Supplementary table 3. NADH oxidase (*nox*) sequences included as references - page 4**

| <b>Accession number</b> | <b>Species</b>               | <b>Strain/isolate</b> | <b>Description</b>                            |
|-------------------------|------------------------------|-----------------------|-----------------------------------------------|
| DQ487123.1              | <i>Brachyspira suanatina</i> | AN 3949:2/02          | NADH oxidase ( <i>nox</i> ) gene, partial cds |
| DQ487119.1              | <i>Brachyspira suanatina</i> | AN 4859/03            | NADH oxidase ( <i>nox</i> ) gene, partial cds |
| DQ487122.1              | <i>Brachyspira suanatina</i> | Dk12570-2             | NADH oxidase ( <i>nox</i> ) gene, partial cds |
| HM462463.1              | <i>Brachyspira suanatina</i> |                       | NADH oxidase ( <i>nox</i> ) gene, partial cds |



**Supplementary table 4. Sequencing statistics**

|                   | Isolate           | Number of contigs | Total length | Min length | max length | mean length | median length | N50     | Coverage |
|-------------------|-------------------|-------------------|--------------|------------|------------|-------------|---------------|---------|----------|
| Clinical Isolates | PC2022III         | 15                | 2609344      | 971        | 671466     | 173956.267  | 91392         | 355956  | 374      |
|                   | PC2777IV          | 30                | 2655229      | 513        | 521706     | 88507.6333  | 3784          | 212275  | 393      |
|                   | PC3053II          | 34                | 2667320      | 507        | 596308     | 78450.5882  | 4755          | 221305  | 353      |
|                   | PC3517II          | 35                | 2645532      | 513        | 422249     | 75586.6286  | 6467          | 279397  | 361      |
|                   | PC3714II          | 24                | 2743156      | 557        | 742608     | 114298.167  | 45756         | 288252  | 386      |
|                   | PC390II           | 32                | 2660153      | 507        | 586895     | 83129.7813  | 16877         | 282401  | 351      |
|                   | PC3939II          | 24                | 2589393      | 627        | 589876     | 107891.375  | 25715         | 317138  | 433      |
|                   | PC3997IV          | 33                | 2649511      | 537        | 938493     | 80288.2121  | 5000          | 576737  | 620      |
|                   | PC4226IV          | 40                | 2715122      | 502        | 457548     | 67878.05    | 23603         | 197907  | 159      |
|                   | PC4580III         | 10                | 2591031      | 660        | 1066433    | 259103.1    | 177803        | 571723  | 482      |
|                   | PC4597II          | 28                | 2670785      | 551        | 980309     | 95385.1786  | 22586         | 311232  | 339      |
|                   | PC5099IV          | 21                | 2714460      | 502        | 674763     | 129260      | 28013         | 390143  | 321      |
|                   | PC5538III-hc      | 113               | 2760914      | 506        | 129964     | 24218.5     | 12067         | 56982   |          |
|                   | PC5538III-lc      | 32                | 2746864      | 510        | 277228     | 85839.5     | 61847         | 195041  |          |
|                   | PC5587-p          | 33                | 2665010      | 551        | 976313     | 80757.8788  | 3345          | 276929  | 320      |
|                   | PC5587-u          | 32                | 2662929      | 551        | 976207     | 83216.5313  | 6064          | 202399  | 476      |
| Type strain       | 513A <sup>T</sup> | 8                 | 2504147      | 554        | 2486925    | 313018.375  | 1436          | 2486925 | 433      |
| Ref. strain       | W1                | 15                | 2666344      | 520        | 827193     | 177756.267  | 24070         | 670021  | 517      |

**Supplementary table 5. Human Microbiome Project (HMP) samples analysed**

| SRA accession | Subject   | Body Site | WGS | Amplified region | Perc. Brachyspira | Brachyspira in assembly |
|---------------|-----------|-----------|-----|------------------|-------------------|-------------------------|
| SRS055563     | 132902142 | stool     |     | V1-V3            |                   | 0%                      |
| SRS058416     | 147406386 | stool     |     | V3-V5            |                   | 0%                      |
| SRS021601     | 158013734 | stool     |     | V1-V3            |                   | 0%                      |
| SRS012191     | 158013734 | stool     |     | V3-V5            |                   | 0%                      |
| SRS022987     | 158114885 | stool     |     | V1-V3            |                   | 0%                      |
| SRS021910     | 158155345 | stool     |     | V1-V3            |                   | 0%                      |
| SRS021541     | 158216035 | stool     |     | V3-V5            |                   | 0%                      |
| SRS022924     | 158236265 | stool     |     | V1-V3            |                   | 0%                      |
| SRS021970     | 158256496 | stool     |     | V3-V5            |                   | 0%                      |
| SRS023047     | 158276726 | stool     |     | V1-V3            |                   | 0%                      |
| SRS022093     | 158337416 | stool     |     | V3-V5            |                   | 0%                      |
| SRS017935     | 158357646 | stool     |     | V3-V5            |                   | 0%                      |
| SRS020119     | 158398106 | stool     |     | V1-V3            |                   | 0%                      |
| SRS020176     | 158418336 | stool     |     | V3-V5            |                   | 0%                      |
| SRS023422     | 158438567 | stool     |     | V3-V5            |                   | 0%                      |
| SRS022480     | 158458797 | stool     |     | V1-V3            |                   | 0%                      |
| SRS021484     | 158479027 | stool     | X   | V3-V5            |                   | 0%                      |
| SRS022609     | 158499257 | stool     | X   | V3-V5            |                   | 0%                      |
| SRS023734     | 158721788 | stool     |     | V3-V5            |                   | 0%                      |
| SRS022414     | 158742018 | stool     |     | V3-V5            |                   | 0%                      |
| SRS011271     | 158802708 | stool     | X   | V1-V3            |                   | 0%                      |
| SRS023545     | 158802708 | stool     |     | V3-V5            |                   | 0%                      |
| SRS011157     | 158822939 | stool     |     | V3-V5            |                   | 0%                      |
| SRS023851     | 158883629 | stool     |     | V1-V3            |                   | 0%                      |
| SRS011300     | 158924089 | stool     |     | V1-V3            |                   | 0%                      |
| SRS023176     | 158924089 | stool     | X   | V3-V5            |                   | 0%                      |
| SRS024265     | 158944319 | stool     | X   | V3-V5            |                   | 0%                      |
| SRS023488     | 158964549 | stool     |     | V1-V3            |                   | 0%                      |
| SRS011410     | 158964549 | stool     |     | V3-V5            |                   | 0%                      |
| SRS011413     | 159005010 | stool     |     | V3-V5            |                   | 0%                      |
| SRS023605     | 159005010 | stool     |     | V3-V5            |                   | 0%                      |
| SRS011415     | 159085930 | stool     |     | V3-V5            |                   | 0%                      |
| SRS042290     | 159085930 | stool     |     | V3-V5            |                   | 0%                      |
| SRS011452     | 159146620 | stool     | X   | V1-V3            |                   | 0%                      |
| SRS048083     | 159146620 | stool     |     | V3-V5            |                   | 0%                      |
| SRS011529     | 159166850 | stool     | X   | V1-V3            |                   | 0%                      |
| SRS057122     | 159166850 | stool     |     | V1-V3            |                   | 0%                      |
| SRS013490     | 159207311 | stool     |     | V3-V5            |                   | 0%                      |
| SRS024151     | 159207311 | stool     |     | V3-V5            |                   | 0%                      |
| SRS013543     | 159227541 | stool     |     | V3-V5            |                   | 0%                      |
| SRS050599     | 159227541 | stool     |     | V3-V5            |                   | 0%                      |
| SRS011405     | 159247771 | stool     | X   | V3-V5            |                   | 0%                      |
| SRS024028     | 159247771 | stool     |     | V3-V5            |                   | 0%                      |
| SRS013687     | 159268001 | stool     | X   | V3-V5            |                   | 0%                      |
| SRS023914     | 159268001 | stool     | X   | V3-V5            |                   | 0%                      |
| SRS013638     | 159288231 | stool     |     | V3-V5            |                   | 0%                      |
| SRS056656     | 159288231 | stool     |     | V3-V5            |                   | 0%                      |
| SRS016841     | 159308461 | stool     |     | V3-V5            |                   | 0%                      |
| SRS024208     | 159308461 | stool     |     | V3-V5            |                   | 0%                      |
| SRS013386     | 159328691 | stool     |     | V3-V5            |                   | 0%                      |
| SRS013177     | 159369152 | stool     |     | V3-V5            |                   | 0%                      |
| SRS023971     | 159369152 | stool     | X   | V3-V5            |                   | 0%                      |
| SRS013762     | 159389382 | stool     |     | V1-V3            |                   | 0%                      |

**Supplementary table 5. Human Microbiome Project (HMP) samples analysed - page 2**

| SRA accession | Subject   | Body Site | WGS | Amplified region | Perc. Brachyspira | Brachyspira in assembly |
|---------------|-----------|-----------|-----|------------------|-------------------|-------------------------|
| SRS024511     | 159389382 | stool     |     | V3-V5            |                   | 0%                      |
| SRS016437     | 159429842 | stool     |     | V3-V5            |                   | 0%                      |
| SRS016916     | 159450072 | stool     |     | V3-V5            |                   | 0%                      |
| SRS049911     | 159450072 | stool     |     | V3-V5            |                   | 0%                      |
| SRS011621     | 159470302 | stool     |     | V1-V3            |                   | 0%                      |
| SRS016990     | 159490532 | stool     |     | V3-V5            |                   | 0%                      |
| SRS057901     | 159490532 | stool     |     | V3-V5            |                   | 0%                      |
| SRS017266     | 159510762 | stool     |     | V3-V5            |                   | 0%                      |
| SRS024094     | 159510762 | stool     |     | V3-V5            |                   | 0%                      |
| SRS063797     | 159510762 | stool     |     | V3-V5            |                   | 0%                      |
| SRS017103     | 159551223 | stool     | X   | V3-V5            |                   | 0%                      |
| SRS024331     | 159551223 | stool     | X   | V3-V5            |                   | 0%                      |
| SRS013801     | 159571453 | stool     |     | V3-V5            |                   | 0%                      |
| SRS024454     | 159571453 | stool     |     | V3-V5            |                   | 0%                      |
| SRS013216     | 159591683 | stool     |     | V3-V5            |                   | 0%                      |
| SRS024568     | 159591683 | stool     |     | V3-V5            |                   | 0%                      |
| SRS016954     | 159611913 | stool     | X   | V3-V5            |                   | 0%                      |
| SRS024625     | 159611913 | stool     | X   | V3-V5            |                   | 0%                      |
| SRS017307     | 159632143 | stool     | X   | V3-V5            |                   | 0%                      |
| SRS054488     | 159632143 | stool     |     | V3-V5            |                   | 0%                      |
| SRS016400     | 159672603 | stool     |     | V3-V5            |                   | 0%                      |
| SRS053956     | 159672603 | stool     |     | V3-V5            |                   | 0%                      |
| SRS011653     | 159713063 | stool     |     | V3-V5            |                   | 0%                      |
| SRS024388     | 159713063 | stool     | X   | V3-V5            |                   | 0%                      |
| SRS011586     | 159733294 | stool     | X   | V1-V3            |                   | 0%                      |
| SRS016517     | 159753524 | stool     | X   | V3-V5            |                   | 0%                      |
| SRS056505     | 159753524 | stool     |     | V3-V5            |                   | 0%                      |
| SRS017191     | 159814214 | stool     | X   | V3-V5            |                   | 0%                      |
| SRS043701     | 159814214 | stool     | X   | V3-V5            |                   | 0%                      |
| SRS016585     | 159915365 | stool     | X   | V3-V5            |                   | 0%                      |
| SRS055934     | 159915365 | stool     |     | V3-V5            |                   | 0%                      |
| SRS018068     | 160016515 | stool     |     | V3-V5            |                   | 0%                      |
| SRS016630     | 160036745 | stool     |     | V3-V5            |                   | 0%                      |
| SRS018076     | 160056975 | stool     |     | V3-V5            |                   | 0%                      |
| SRS045627     | 160056975 | stool     |     | V3-V5            |                   | 0%                      |
| SRS018190     | 160097436 | stool     |     | V3-V5            |                   | 0%                      |
| SRS042843     | 160097436 | stool     |     | V3-V5            |                   | 0%                      |
| SRS018133     | 160158126 | stool     | X   | V3-V5            |                   | 0%                      |
| SRS058770     | 160158126 | stool     | X   | V3-V5            |                   | 0%                      |
| SRS018370     | 160178356 | stool     |     | V3-V5            |                   | 0%                      |
| SRS055137     | 160178356 | stool     |     | V3-V5            |                   | 0%                      |
| SRS018427     | 160218816 | stool     | X   | V3-V5            |                   | 0%                      |
| SRS042436     | 160218816 | stool     |     | V3-V5            |                   | 0%                      |
| SRS017997     | 160239046 | stool     |     | V3-V5            |                   | 0%                      |
| SRS018489     | 160259276 | stool     |     | V3-V5            |                   | 0%                      |
| SRS017455     | 160319967 | stool     |     | V3-V5            |                   | 0%                      |
| SRS045493     | 160319967 | stool     |     | V3-V5            |                   | 0%                      |
| SRS018313     | 160380657 | stool     | X   | V3-V5            |                   | 0%                      |
| SRS048299     | 160380657 | stool     |     | V3-V5            |                   | 0%                      |
| SRS020233     | 160400887 | stool     | X   | V3-V5            |                   | 0%                      |
| SRS051609     | 160400887 | stool     |     | V3-V5            |                   | 0%                      |
| SRS016753     | 160421117 | stool     | X   | V3-V5            |                   | 0%                      |
| SRS045350     | 160421117 | stool     |     | V3-V5            |                   | 0%                      |

**Supplementary table 5. Human Microbiome Project (HMP) samples analysed - page 3**

| SRA accession | Subject   | Body Site | WGS | Amplified region | Perc. Brachyspira | Brachyspira in assembly |
|---------------|-----------|-----------|-----|------------------|-------------------|-------------------------|
| SRS017878     | 160441347 | stool     |     | V3-V5            |                   | 0%                      |
| SRS017641     | 160461578 | stool     |     | V3-V5            |                   | 0%                      |
| SRS017394     | 160481808 | stool     |     | V3-V5            |                   | 0%                      |
| SRS017521     | 160502038 | stool     | X   | V3-V5            |                   | 0%                      |
| SRS056255     | 160502038 | stool     |     | V3-V5            |                   | 0%                      |
| SRS017764     | 160542498 | stool     |     | V3-V5            |                   | 0%                      |
| SRS017701     | 160582958 | stool     | X   | V3-V5            |                   | 0%                      |
| SRS047561     | 160582958 | stool     |     | V3-V5            |                   | 0%                      |
| SRS017821     | 160603188 | stool     | X   | V3-V5            |                   | 0%                      |
| SRS052555     | 160603188 | stool     |     | V3-V5            |                   | 0%                      |
| SRS019990     | 160643649 | stool     |     | V3-V5            |                   | 0%                      |
| SRS049982     | 160643649 | stool     |     | V3-V5            |                   | 0%                      |
| SRS020290     | 160663879 | stool     |     | V3-V5            |                   | 0%                      |
| SRS020413     | 160684109 | stool     |     | V3-V5            |                   | 0%                      |
| SRS020350     | 160704339 | stool     |     | V3-V5            |                   | 0%                      |
| SRS050141     | 160704339 | stool     |     | V3-V5            |                   | 0%                      |
| SRS021109     | 160744799 | stool     |     | V1-V3            |                   | 0%                      |
| SRS020869     | 160765029 | stool     | X   | V3-V5            |                   | 0%                      |
| SRS047967     | 160765029 | stool     |     | V3-V5            |                   | 0%                      |
| SRS020470     | 160825720 | stool     |     | V1-V3            |                   | 0%                      |
| SRS045910     | 160825720 | stool     |     | V3-V5            |                   | 0%                      |
| SRS020527     | 160845950 | stool     |     | V3-V5            |                   | 0%                      |
| SRS053301     | 160845950 | stool     |     | V3-V5            |                   | 0%                      |
| SRS021065     | 160866180 | stool     |     | V1-V3            |                   | 0%                      |
| SRS057258     | 160866180 | stool     |     | V3-V5            |                   | 0%                      |
| SRS020811     | 160886410 | stool     |     | V1-V3            |                   | 0%                      |
| SRS020584     | 160906640 | stool     |     | V1-V3            |                   | 0%                      |
| SRS020641     | 160947100 | stool     |     | V1-V3            |                   | 0%                      |
| SRS051086     | 160947100 | stool     |     | V3-V5            |                   | 0%                      |
| SRS021427     | 160967330 | stool     |     | V3-V5            |                   | 0%                      |
| SRS049949     | 160967330 | stool     |     | V3-V5            |                   | 0%                      |
| SRS020698     | 160987560 | stool     |     | V3-V5            |                   | 0%                      |
| SRS043769     | 160987560 | stool     |     | V3-V5            |                   | 0%                      |
| SRS042572     | 161007791 | stool     |     | V1-V3            |                   | 0%                      |
| SRS021175     | 161007791 | stool     |     | V3-V5            |                   | 0%                      |
| SRS021364     | 161028021 | stool     |     | V3-V5            |                   | 0%                      |
| SRS020926     | 161068481 | stool     |     | V3-V5            |                   | 0%                      |
| SRS021241     | 161230322 | stool     |     | V3-V5            |                   | 0%                      |
| SRS021853     | 161270782 | stool     |     | V1-V3            |                   | 0%                      |
| SRS056832     | 161270782 | stool     |     | V1-V3            |                   | 0%                      |
| SRS020983     | 161311242 | stool     |     | V3-V5            |                   | 0%                      |
| SRS046216     | 161311242 | stool     |     | V3-V5            |                   | 0%                      |
| SRS049766     | 161331472 | stool     |     | V1-V3            |                   | 0%                      |
| SRS021664     | 161331472 | stool     |     | V3-V5            |                   | 0%                      |
| SRS021304     | 161351702 | stool     |     | V3-V5            |                   | 0%                      |
| SRS053525     | 161351702 | stool     |     | V3-V5            |                   | 0%                      |
| SRS020755     | 161412393 | stool     |     | V3-V5            |                   | 0%                      |
| SRS044088     | 161412393 | stool     |     | V3-V5            |                   | 0%                      |
| SRS021790     | 161473083 | stool     |     | V3-V5            |                   | 0%                      |
| SRS051892     | 161473083 | stool     |     | V3-V5            |                   | 0%                      |
| SRS021724     | 161493313 | stool     |     | V3-V5            |                   | 0%                      |
| SRS022033     | 161554003 | stool     |     | V3-V5            |                   | 0%                      |
| SRS055727     | 161554003 | stool     |     | V3-V5            |                   | 0%                      |

**Supplementary table 5. Human Microbiome Project (HMP) samples analysed - page 4**

| SRA accession | Subject   | Body Site | WGS | Amplified region | Perc. Brachyspira | Brachyspira in assembly |
|---------------|-----------|-----------|-----|------------------|-------------------|-------------------------|
| SRS054608     | 178713055 | stool     |     | V1-V3            |                   | 0%                      |
| SRS043299     | 184349034 | stool     |     | V3-V5            |                   | 0%                      |
| SRS023302     | 206906765 | stool     |     | V3-V5            |                   | 0%                      |
| SRS048722     | 208027353 | stool     |     | V3-V5            |                   | 0%                      |
| SRS023365     | 246515023 | stool     |     | V3-V5            |                   | 0%                      |
| SRS042365     | 246515023 | stool     |     | V3-V5            |                   | 0%                      |
| SRS063138     | 257905678 | stool     |     | V3-V5            |                   | 0%                      |
| SRS048838     | 275382046 | stool     |     | V1-V3            |                   | 0%                      |
| SRS046382     | 289996019 | stool     |     | V1-V3            |                   | 0%                      |
| SRS062847     | 289996019 | stool     |     | V1-V3            |                   | 0%                      |
| SRS063608     | 295137534 | stool     |     | V1-V3            |                   | 0%                      |
| SRS022798     | 295137534 | stool     |     | V3-V5            |                   | 0%                      |
| SRS023791     | 336497421 | stool     |     | V3-V5            |                   | 0%                      |
| SRS063918     | 336497421 | stool     |     | V3-V5            |                   | 0%                      |
| SRS054590     | 338793263 | stool     | X   | V3-V5            |                   | 0%                      |
| SRS057267     | 355657046 | stool     |     | V3-V5            |                   | 0%                      |
| SRS024682     | 368533040 | stool     |     | V3-V5            |                   | 0%                      |
| SRS065628     | 368533040 | stool     |     | V3-V5            |                   | 0%                      |
| SRS046349     | 370027359 | stool     |     | V1-V3            |                   | 0%                      |
| SRS022735     | 370425937 | stool     |     | V3-V5            |                   | 0%                      |
| SRS042803     | 370425937 | stool     |     | V3-V5            |                   | 0%                      |
| SRS052196     | 375450439 | stool     |     | V1-V3            |                   | 0%                      |
| SRS063275     | 375450439 | stool     |     | V1-V3            |                   | 0%                      |
| SRS043804     | 404239096 | stool     |     | V3-V5            |                   | 0%                      |
| SRS064008     | 414519462 | stool     |     | V1-V3            |                   | 0%                      |
| SRS049157     | 414519462 | stool     |     | V3-V5            |                   | 0%                      |
| SRS022669     | 432193348 | stool     |     | V3-V5            |                   | 0%                      |
| SRS023106     | 441369442 | stool     |     | V3-V5            |                   | 0%                      |
| SRS064335     | 451588811 | stool     |     | V3-V5            |                   | 0%                      |
| SRS044415     | 465578759 | stool     |     | V3-V5            |                   | 0%                      |
| SRS022354     | 492786515 | stool     |     | V3-V5            |                   | 0%                      |
| SRS063968     | 492786515 | stool     |     | V3-V5            |                   | 0%                      |
| SRS053335     | 508703490 | stool     | X   | V1-V3            |                   | 0%                      |
| SRS048008     | 514014184 | stool     |     | V3-V5            |                   | 0%                      |
| SRS046313     | 516889361 | stool     |     | V3-V5            |                   | 0%                      |
| SRS042415     | 517810313 | stool     |     | V3-V5            |                   | 0%                      |
| SRS022291     | 533247696 | stool     |     | V3-V5            |                   | 0%                      |
| SRS056620     | 550534656 | stool     |     | V1-V3            |                   | 0%                      |
| SRS045613     | 553359145 | stool     |     | V1-V3            |                   | 0%                      |
| SRS065665     | 561079058 | stool     |     | V1-V3            |                   | 0%                      |
| SRS047950     | 604812005 | stool     |     | V3-V5            |                   | 0%                      |
| SRS055697     | 604812005 | stool     |     | V3-V5            |                   | 0%                      |
| SRS055482     | 612472597 | stool     |     | V1-V3            |                   | 0%                      |
| SRS022159     | 638754422 | stool     |     | V3-V5            |                   | 0%                      |
| SRS057676     | 638754422 | stool     |     | V3-V5            |                   | 0%                      |
| SRS050733     | 643185023 | stool     |     | V3-V5            |                   | 0%                      |
| SRS063807     | 650853796 | stool     |     | V1-V3            |                   | 0%                      |
| SRS022858     | 650853796 | stool     |     | V3-V5            |                   | 0%                      |
| SRS065466     | 663835652 | stool     |     | V3-V5            |                   | 0%                      |
| SRS057447     | 668248235 | stool     |     | V1-V3            |                   | 0%                      |
| SRS054461     | 675950834 | stool     |     | V1-V3            |                   | 0%                      |
| SRS065725     | 682102541 | stool     |     | V1-V3            |                   | 0%                      |
| SRS052433     | 682449369 | stool     |     | V1-V3            |                   | 0%                      |

**Supplementary table 5. Human Microbiome Project (HMP) samples analysed - page 5**

| SRA accession | Subject   | Body Site | WGS | Amplified region | Perc. Brachyspira | Brachyspira in assembly |
|---------------|-----------|-----------|-----|------------------|-------------------|-------------------------|
| SRS064647     | 686765762 | stool     |     | V1-V3            |                   | 0%                      |
| SRS047642     | 686765762 | stool     |     | V3-V5            |                   | 0%                      |
| SRS052697     | 706846339 | stool     | X   | V1-V3            |                   | 0%                      |
| SRS045414     | 737052003 | stool     |     | V3-V5            |                   | 0%                      |
| SRS063324     | 739574095 | stool     |     | V1-V3            |                   | 0%                      |
| SRS065263     | 763395383 | stool     |     | V1-V3            |                   | 0%                      |
| SRS015815     | 763435843 | stool     |     | V3-V5            |                   | 0%                      |
| SRS045526     | 763456073 | stool     |     | V3-V5            |                   | 0%                      |
| SRS046341     | 763476303 | stool     |     | V3-V5            |                   | 0%                      |
| SRS054928     | 763516763 | stool     |     | V1-V3            |                   | 0%                      |
| SRS014369     | 763516763 | stool     |     | V3-V5            |                   | 0%                      |
| SRS014287     | 763536994 | stool     | X   | V1-V3            |                   | 0%                      |
| SRS050422     | 763536994 | stool     | X   | V1-V3            |                   | 0%                      |
| SRS062427     | 763536994 | stool     | X   | V3-V5            |                   | 0%                      |
| SRS046639     | 763557224 | stool     |     | V3-V5            |                   | 0%                      |
| SRS014659     | 763597684 | stool     |     | V3-V5            |                   | 0%                      |
| SRS019582     | 763597684 | stool     | X   | V3-V5            |                   | 0%                      |
| SRS014572     | 763638144 | stool     |     | V3-V5            |                   | 0%                      |
| SRS063898     | 763638144 | stool     |     | V3-V5            |                   | 0%                      |
| SRS014235     | 763678604 | stool     | X   | V3-V5            |                   | 0%                      |
| SRS019685     | 763678604 | stool     | X   | V3-V5            |                   | 0%                      |
| SRS014442     | 763698834 | stool     |     | V1-V3            |                   | 0%                      |
| SRS048819     | 763698834 | stool     |     | V3-V5            |                   | 0%                      |
| SRS063921     | 763719065 | stool     |     | V1-V3            |                   | 0%                      |
| SRS062610     | 763721271 | stool     |     | V3-V5            |                   | 0%                      |
| SRS015190     | 763759525 | stool     | X   | V1-V3            |                   | 0%                      |
| SRS043411     | 763759525 | stool     | X   | V1-V3            |                   | 0%                      |
| SRS052326     | 763820215 | stool     |     | V1-V3            |                   | 0%                      |
| SRS014345     | 763820215 | stool     |     | V3-V5            |                   | 0%                      |
| SRS014613     | 763840445 | stool     | X   | V1-V3            |                   | 0%                      |
| SRS064276     | 763840445 | stool     | X   | V3-V5            |                   | 0%                      |
| SRS014923     | 763860675 | stool     | X   | V1-V3            |                   | 0%                      |
| SRS049428     | 763860675 | stool     |     | V1-V3            |                   | 0%                      |
| SRS014978     | 763880905 | stool     |     | V3-V5            |                   | 0%                      |
| SRS049620     | 763880905 | stool     |     | V3-V5            |                   | 0%                      |
| SRS015133     | 763901136 | stool     | X   | V1-V3            |                   | 0%                      |
| SRS063985     | 763901136 | stool     | X   | V1-V3            |                   | 0%                      |
| SRS014823     | 763921366 | stool     |     | V3-V5            |                   | 0%                      |
| SRS045877     | 763982056 | stool     |     | V1-V3            |                   | 0%                      |
| SRS015281     | 763982056 | stool     |     | V3-V5            |                   | 0%                      |
| SRS015854     | 764002286 | stool     | X   | V1-V3            |                   | 0%                      |
| SRS014885     | 764002286 | stool     |     | V3-V5            |                   | 0%                      |
| SRS064557     | 764042746 | stool     | X   | V1-V3            |                   | 0%                      |
| SRS015389     | 764042746 | stool     |     | V3-V5            |                   | 0%                      |
| SRS014999     | 764062976 | stool     |     | V3-V5            |                   | 0%                      |
| SRS015452     | 764083206 | stool     |     | V3-V5            |                   | 0%                      |
| SRS019089     | 764083206 | stool     |     | V6-V9            |                   | 0%                      |
| SRS015247     | 764143897 | stool     |     | V1-V3            |                   | 0%                      |
| SRS055665     | 764143897 | stool     |     | V1-V3            |                   | 0%                      |
| SRS015332     | 764184357 | stool     |     | V3-V5            |                   | 0%                      |
| SRS048870     | 764184357 | stool     | X   | V3-V5            |                   | 0%                      |
| SRS049748     | 764224817 | stool     |     | V1-V3            |                   | 0%                      |
| SRS015782     | 764224817 | stool     | X   | V3-V5            |                   | 0%                      |

**Supplementary table 5. Human Microbiome Project (HMP) samples analysed - page 6**

| SRA accession | Subject   | Body Site | WGS | Amplified region | Perc. Brachyspira | Brachyspira in assembly |
|---------------|-----------|-----------|-----|------------------|-------------------|-------------------------|
| SRS015518     | 764245047 | stool     |     | V3-V5            | 0%                |                         |
| SRS015578     | 764285508 | stool     | X   | V1-V3            | 0%                |                         |
| SRS015911     | 764305738 | stool     |     | V1-V3            | 0%                |                         |
| SRS019013     | 764305738 | stool     |     | V3-V5            | 0%                |                         |
| SRS056259     | 764325968 | stool     | X   | V1-V3            | 0.036%            | X                       |
| SRS015960     | 764325968 | stool     | X   | V3-V5            | 0.033%            | X                       |
| SRS015599     | 764346198 | stool     |     | V1-V3            | 0%                |                         |
| SRS064233     | 764346198 | stool     |     | V3-V5            | 0%                |                         |
| SRS016152     | 764366428 | stool     |     | V3-V5            | 0%                |                         |
| SRS016018     | 764447348 | stool     | X   | V1-V3            | 0%                |                         |
| SRS042628     | 764447348 | stool     | X   | V1-V3            | 0%                |                         |
| SRS015724     | 764467579 | stool     |     | V1-V3            | 0%                |                         |
| SRS051031     | 764487809 | stool     | X   | V1-V3            | 0%                |                         |
| SRS015663     | 764487809 | stool     | X   | V3-V5            | 0%                |                         |
| SRS016056     | 764508039 | stool     | X   | V1-V3            | 0%                |                         |
| SRS016095     | 764588959 | stool     | X   | V1-V3            | 0%                |                         |
| SRS016203     | 764649650 | stool     | X   | V1-V3            | 0%                |                         |
| SRS016267     | 764669880 | stool     | X   | V3-V5            | 0%                |                         |
| SRS019787     | 764669880 | stool     | X   | V3-V5            | 0%                |                         |
| SRS018559     | 764710340 | stool     |     | V3-V5            | 0%                |                         |
| SRS062464     | 764750800 | stool     |     | V1-V3            | 0%                |                         |
| SRS042703     | 764811490 | stool     |     | V1-V3            | 0%                |                         |
| SRS063961     | 764831721 | stool     |     | V3-V5            | 0%                |                         |
| SRS063827     | 764872181 | stool     |     | V3-V5            | 0%                |                         |
| SRS019910     | 764892411 | stool     | X   | V3-V5            | 0%                |                         |
| SRS063214     | 764953101 | stool     |     | V1-V3            | 0%                |                         |
| SRS018733     | 765013792 | stool     |     | V1-V3            | 0%                |                         |
| SRS019267     | 765034022 | stool     | X   | V3-V5            | 0%                |                         |
| SRS016335     | 765074482 | stool     | X   | V1-V3            | 0%                |                         |
| SRS049164     | 765074482 | stool     | X   | V1-V3            | 0%                |                         |
| SRS042669     | 765094712 | stool     |     | V1-V3            | 0%                |                         |
| SRS018607     | 765094712 | stool     |     | V3-V5            | 0%                |                         |
| SRS018817     | 765135172 | stool     | X   | V3-V5            | 0%                |                         |
| SRS018655     | 765155402 | stool     |     | V1-V3            | 0%                |                         |
| SRS018712     | 765195863 | stool     |     | V1-V3            | 0%                |                         |
| SRS018920     | 765216093 | stool     |     | V1-V3            | 0%                |                         |
| SRS018872     | 765256553 | stool     |     | V1-V3            | 0%                |                         |
| SRS018968     | 765276783 | stool     |     | V1-V3            | 0%                |                         |
| SRS019534     | 765317243 | stool     |     | V1-V3            | 0%                |                         |
| SRS019381     | 765337473 | stool     |     | V1-V3            | 0%                |                         |
| SRS019846     | 765661155 | stool     |     | V3-V5            | 0%                |                         |
| SRS049959     | 765701615 | stool     | X   | V3-V5            | 0%                |                         |
| SRS065421     | 809635352 | stool     |     | V1-V3            | 0%                |                         |
| SRS022546     | 809635352 | stool     |     | V3-V5            | 0%                |                         |
| SRS048853     | 840279516 | stool     |     | V3-V5            | 0%                |                         |
| SRS045607     | 857980665 | stool     |     | V3-V5            | 0%                |                         |
| SRS052471     | 861967750 | stool     |     | V3-V5            | 0%                |                         |
| SRS042387     | 863126187 | stool     |     | V3-V5            | 0%                |                         |
| SRS063068     | 866653606 | stool     |     | V3-V5            | 0%                |                         |
| SRS063524     | 872848689 | stool     |     | V3-V5            | 0%                |                         |
| SRS023671     | 892969023 | stool     |     | V3-V5            | 0%                |                         |
| SRS065500     | 892969023 | stool     |     | V3-V5            | 0%                |                         |
| SRS064321     | 901775393 | stool     |     | V1-V3            | 0%                |                         |

**Supplementary table 5. Human Microbiome Project (HMP) samples analysed - page 7**

| SRA accession | Subject   | Body Site | WGS | Amplified region | Perc. Brachyspira | Brachyspira in assembly |
|---------------|-----------|-----------|-----|------------------|-------------------|-------------------------|
| SRS044146     | 937415040 | stool     |     | V3-V5            | 0%                |                         |
| SRS063307     | 937495960 | stool     |     | V3-V5            | 0%                |                         |
| SRS049823     | 953045535 | stool     |     | V3-V5            | 0%                |                         |
| SRS023242     | 964271349 | stool     |     | V3-V5            | 0%                |                         |
| SRS022225     | 970836795 | stool     |     | V3-V5            | 0%                |                         |
| SRS050374     | 970836795 | stool     |     | V3-V5            | 0%                |                         |
| SRS011061     |           | stool     | X   |                  |                   |                         |
| SRS011084     |           | stool     | X   |                  |                   |                         |
| SRS011134     |           | stool     | X   |                  |                   |                         |
| SRS011239     |           | stool     | X   |                  |                   |                         |
| SRS011302     |           | stool     | X   |                  |                   |                         |
| SRS012273     |           | stool     | X   |                  |                   |                         |
| SRS012902     |           | stool     | X   |                  |                   |                         |
| SRS013158     |           | stool     | X   |                  |                   |                         |
| SRS013215     |           | stool     | X   |                  |                   |                         |
| SRS013476     |           | stool     | X   |                  |                   |                         |
| SRS013521     |           | stool     | X   |                  |                   |                         |
| SRS013800     |           | stool     | X   |                  |                   |                         |
| SRS013951     |           | stool     | X   |                  |                   |                         |
| SRS014313     |           | stool     | X   |                  |                   |                         |
| SRS014459     |           | stool     | X   |                  |                   |                         |
| SRS014683     |           | stool     | X   |                  |                   |                         |
| SRS014979     |           | stool     | X   |                  |                   |                         |
| SRS015065     |           | stool     | X   |                  |                   |                         |
| SRS015217     |           | stool     | X   |                  |                   |                         |
| SRS015264     |           | stool     | X   |                  |                   |                         |
| SRS015369     |           | stool     | X   |                  |                   |                         |
| SRS015794     |           | stool     | X   |                  |                   |                         |
| SRS016989     |           | stool     | X   |                  |                   |                         |
| SRS017247     |           | stool     | X   |                  |                   |                         |
| SRS017433     |           | stool     | X   |                  |                   |                         |
| SRS018351     |           | stool     | X   |                  |                   |                         |
| SRS018575     |           | stool     | X   |                  |                   |                         |
| SRS018656     |           | stool     | X   |                  |                   |                         |
| SRS019030     |           | stool     | X   |                  |                   |                         |
| SRS019161     |           | stool     | X   |                  |                   |                         |
| SRS019397     |           | stool     | X   |                  |                   |                         |
| SRS019601     |           | stool     | X   |                  |                   |                         |
| SRS019968     |           | stool     | X   |                  |                   |                         |
| SRS020328     |           | stool     | X   |                  |                   |                         |
| SRS021948     |           | stool     | X   |                  |                   |                         |
| SRS022071     |           | stool     | X   |                  |                   |                         |
| SRS022137     |           | stool     | X   |                  |                   |                         |
| SRS022524     |           | stool     | X   |                  |                   |                         |
| SRS022713     |           | stool     | X   |                  |                   |                         |
| SRS023346     |           | stool     | X   |                  |                   |                         |
| SRS023526     |           | stool     | X   |                  |                   |                         |
| SRS023583     |           | stool     | X   |                  |                   |                         |
| SRS023829     |           | stool     | X   |                  |                   |                         |
| SRS024009     |           | stool     | X   |                  |                   |                         |
| SRS024075     |           | stool     | X   |                  |                   |                         |
| SRS024132     |           | stool     | X   |                  |                   |                         |
| SRS024435     |           | stool     | X   |                  |                   |                         |



**Supplementary table 5. Human Microbiome Project (HMP) samples analysed - page 8**

| SRA accession | Subject | Body Site | WGS | Amplified region | Perc. Brachyspira | Brachyspira in assembly |
|---------------|---------|-----------|-----|------------------|-------------------|-------------------------|
| SRS024549     |         | stool     | X   |                  |                   |                         |
| SRS042284     |         | stool     | X   |                  |                   |                         |
| SRS043001     |         | stool     | X   |                  |                   |                         |
| SRS045004     |         | stool     | X   |                  |                   |                         |
| SRS045645     |         | stool     | X   |                  |                   |                         |
| SRS045713     |         | stool     | X   |                  |                   |                         |
| SRS047014     |         | stool     | X   |                  |                   |                         |
| SRS047044     |         | stool     | X   |                  |                   |                         |
| SRS048164     |         | stool     | X   |                  |                   |                         |
| SRS049712     |         | stool     | X   |                  |                   |                         |
| SRS049900     |         | stool     | X   |                  |                   |                         |
| SRS049995     |         | stool     | X   |                  |                   |                         |
| SRS050299     |         | stool     | X   |                  |                   |                         |
| SRS050752     |         | stool     | X   |                  |                   |                         |
| SRS050925     |         | stool     | X   |                  |                   |                         |
| SRS051882     |         | stool     | X   |                  |                   |                         |
| SRS052027     |         | stool     | X   |                  |                   |                         |
| SRS053214     |         | stool     | X   |                  |                   |                         |
| SRS053335     |         | stool     | X   |                  |                   |                         |
| SRS053398     |         | stool     | X   |                  |                   |                         |
| SRS054956     |         | stool     | X   |                  |                   |                         |
| SRS055982     |         | stool     | X   |                  |                   |                         |
| SRS056519     |         | stool     | X   |                  |                   |                         |
| SRS057478     |         | stool     | X   |                  |                   |                         |
| SRS057717     |         | stool     | X   |                  |                   |                         |
| SRS058723     |         | stool     | X   |                  |                   |                         |
| SRS063040     |         | stool     | X   |                  |                   |                         |
| SRS064645     |         | stool     | X   |                  |                   |                         |
| SRS065504     |         | stool     | X   |                  |                   |                         |
| SRS075398     |         | stool     | X   |                  |                   |                         |
| SRS077730     |         | stool     | X   |                  |                   |                         |
| SRS078176     |         | stool     | X   |                  |                   |                         |

**Supplementary table 6. Average Nucleotide Identity between strains of the *Brachyspira* genus**

|                                         | <i>B. hyodysenteriae</i> NX | PC5099IV | PC3997IV | PC5538III-lc | PC4226IV | <i>B. hampsonii</i> 30446 | <i>B. hampsonii</i> 30599 | PC3939II | <i>B. alvinipulli</i> ATCC51933-T324 | 513A <sup>T</sup> |
|-----------------------------------------|-----------------------------|----------|----------|--------------|----------|---------------------------|---------------------------|----------|--------------------------------------|-------------------|
| <i>B. hyodysenteriae</i> NX             | 1.00                        | 0.82     | 0.83     | 0.82         | 0.82     | 0.89                      | 0.89                      | 0.82     | 0.87                                 | 0.82              |
| PC5099IV                                | 0.82                        | 1.00     | 0.97     | 0.97         | 1.00     | 0.82                      | 0.82                      | 0.97     | 0.82                                 | 0.97              |
| PC3997IV                                | 0.83                        | 0.97     | 1.00     | 0.97         | 0.97     | 0.82                      | 0.82                      | 0.97     | 0.82                                 | 0.97              |
| PC5538III-lc                            | 0.82                        | 0.97     | 0.97     | 1.00         | 0.97     | 0.82                      | 0.82                      | 0.97     | 0.82                                 | 0.97              |
| PC4226IV                                | 0.82                        | 1.00     | 0.97     | 0.97         | 1.00     | 0.82                      | 0.82                      | 0.97     | 0.82                                 | 0.97              |
| <i>B. hampsonii</i> 30446               | 0.89                        | 0.82     | 0.82     | 0.82         | 0.82     | 1.00                      | 0.94                      | 0.82     | 0.86                                 | 0.82              |
| <i>B. hampsonii</i> 30599               | 0.89                        | 0.82     | 0.82     | 0.82         | 0.82     | 0.94                      | 1.00                      | 0.82     | 0.86                                 | 0.82              |
| PC3939II                                | 0.82                        | 0.97     | 0.97     | 0.97         | 0.97     | 0.82                      | 0.82                      | 1.00     | 0.82                                 | 0.97              |
| <i>B. alvinipulli</i> ATCC51933-T324    | 0.87                        | 0.82     | 0.82     | 0.82         | 0.82     | 0.86                      | 0.86                      | 0.82     | 1.00                                 | 0.82              |
| 513A <sup>T</sup>                       | 0.82                        | 0.97     | 0.97     | 0.97         | 0.97     | 0.82                      | 0.82                      | 0.97     | 0.82                                 | 1.00              |
| <i>B. suanatina</i> AN4859-03           | 0.93                        | 0.82     | 0.82     | 0.82         | 0.82     | 0.89                      | 0.89                      | 0.82     | 0.87                                 | 0.82              |
| <i>B. sp</i> G79                        | 0.86                        | 0.83     | 0.83     | 0.82         | 0.83     | 0.87                      | 0.88                      | 0.83     | 0.86                                 | 0.83              |
| PC5538III-hc                            | 0.86                        | 0.83     | 0.83     | 0.82         | 0.83     | 0.86                      | 0.86                      | 0.83     | 0.85                                 | 0.82              |
| PC2777IV                                | 0.82                        | 0.97     | 0.97     | 0.97         | 0.97     | 0.82                      | 0.82                      | 0.97     | 0.82                                 | 0.97              |
| <i>B. pilosicoli</i> P43/6/78           | 0.86                        | 0.83     | 0.83     | 0.83         | 0.83     | 0.85                      | 0.86                      | 0.83     | 0.86                                 | 0.83              |
| <i>B. hampsonii</i> NSH-24              | 0.89                        | 0.82     | 0.82     | 0.82         | 0.82     | 1.00                      | 0.94                      | 0.82     | 0.86                                 | 0.82              |
| PC5587-u                                | 0.82                        | 0.99     | 0.97     | 0.97         | 0.99     | 0.82                      | 0.82                      | 0.97     | 0.82                                 | 0.97              |
| PC3714II                                | 0.82                        | 0.97     | 0.97     | 0.97         | 0.97     | 0.82                      | 0.82                      | 0.97     | 0.82                                 | 0.97              |
| <i>B. hyodysenteriae</i> 865            | 0.99                        | 0.82     | 0.82     | 0.82         | 0.82     | 0.89                      | 0.89                      | 0.82     | 0.87                                 | 0.82              |
| <i>B. pilosicoli</i> B2904              | 0.86                        | 0.83     | 0.83     | 0.82         | 0.83     | 0.85                      | 0.86                      | 0.83     | 0.86                                 | 0.82              |
| <i>B. sp</i> CAG-700                    | 0.82                        | 0.99     | 0.97     | 0.97         | 0.99     | 0.82                      | 0.82                      | 0.97     | 0.82                                 | 0.97              |
| <i>B. hampsonii</i> NSH-16              | 0.89                        | 0.82     | 0.82     | 0.82         | 0.82     | 0.94                      | 1.00                      | 0.82     | 0.86                                 | 0.82              |
| PC3517II                                | 0.82                        | 0.97     | 0.99     | 0.97         | 0.97     | 0.82                      | 0.82                      | 0.97     | 0.82                                 | 0.97              |
| PC390II                                 | 0.82                        | 0.99     | 0.97     | 0.97         | 0.99     | 0.82                      | 0.82                      | 0.97     | 0.82                                 | 0.97              |
| PC4597II                                | 0.82                        | 0.99     | 0.97     | 0.97         | 0.99     | 0.82                      | 0.82                      | 0.97     | 0.82                                 | 0.97              |
| <i>B. pilosicoli</i> 95-1000            | 0.86                        | 0.83     | 0.83     | 0.83         | 0.83     | 0.85                      | 0.86                      | 0.83     | 0.86                                 | 0.82              |
| <i>B. hampsonii</i> P280-1              | 0.89                        | 0.82     | 0.82     | 0.82         | 0.82     | 0.95                      | 0.94                      | 0.82     | 0.86                                 | 0.82              |
| <i>B. hyodysenteriae</i> WA1            | 0.99                        | 0.82     | 0.82     | 0.82         | 0.82     | 0.89                      | 0.89                      | 0.82     | 0.87                                 | 0.82              |
| PC4580III                               | 0.82                        | 0.97     | 0.97     | 0.97         | 0.97     | 0.82                      | 0.82                      | 0.97     | 0.82                                 | 0.97              |
| <i>B. intermedia</i> PWS-A              | 0.92                        | 0.82     | 0.82     | 0.82         | 0.82     | 0.89                      | 0.89                      | 0.82     | 0.87                                 | 0.82              |
| <i>B. pilosicoli</i> WesB               | 0.86                        | 0.83     | 0.83     | 0.82         | 0.83     | 0.85                      | 0.86                      | 0.83     | 0.86                                 | 0.82              |
| <i>B. hyodysenteriae</i> FMV89-3323     | 0.99                        | 0.82     | 0.82     | 0.82         | 0.82     | 0.89                      | 0.89                      | 0.82     | 0.87                                 | 0.82              |
| <i>B. innocens</i> ATCC29796, B256-F811 | 0.86                        | 0.82     | 0.82     | 0.82         | 0.82     | 0.88                      | 0.88                      | 0.82     | 0.86                                 | 0.82              |
| PC5587-p                                | 0.82                        | 0.99     | 0.97     | 0.97         | 0.99     | 0.82                      | 0.82                      | 0.97     | 0.82                                 | 0.97              |
| PC2022III                               | 0.82                        | 0.97     | 0.97     | 0.97         | 0.97     | 0.82                      | 0.82                      | 0.97     | 0.82                                 | 0.97              |
| W1                                      | 0.82                        | 0.97     | 0.97     | 0.97         | 0.97     | 0.82                      | 0.82                      | 0.97     | 0.82                                 | 0.97              |
| <i>B. murdochii</i> DSM12563            | 0.86                        | 0.82     | 0.82     | 0.82         | 0.82     | 0.88                      | 0.88                      | 0.82     | 0.86                                 | 0.82              |
| PC3053II                                | 0.82                        | 0.97     | 0.97     | 0.97         | 0.97     | 0.82                      | 0.82                      | 0.97     | 0.82                                 | 0.97              |
| <i>B. hyodysenteriae</i> ATCC27164      | 0.99                        | 0.82     | 0.82     | 0.82         | 0.82     | 0.89                      | 0.89                      | 0.82     | 0.87                                 | 0.82              |

Supplementary table 6. Average Nucleotide Identity between strains of the *Brachyspira* genus- page 2

|                                         | <i>B. suanatina</i> AN4859-03 | <i>B. sp</i> G79 | PC5538III-hc | PC2777IV | <i>B. pilosicoli</i> P43/6/78 | <i>B. hampsonii</i> NSH-24 | PC5587-u | PC3714II | <i>B. hyodysenteriae</i> 865 | <i>B. pilosicoli</i> B2904 |
|-----------------------------------------|-------------------------------|------------------|--------------|----------|-------------------------------|----------------------------|----------|----------|------------------------------|----------------------------|
| <i>B. hyodysenteriae</i> NX             | 0.93                          | 0.86             | 0.86         | 0.82     | 0.86                          | 0.89                       | 0.82     | 0.82     | 0.99                         | 0.86                       |
| PC5099IV                                | 0.82                          | 0.83             | 0.83         | 0.97     | 0.83                          | 0.82                       | 0.99     | 0.97     | 0.82                         | 0.83                       |
| PC3997IV                                | 0.82                          | 0.83             | 0.83         | 0.97     | 0.83                          | 0.82                       | 0.97     | 0.97     | 0.82                         | 0.83                       |
| PC5538III-lc                            | 0.82                          | 0.82             | 0.82         | 0.97     | 0.83                          | 0.82                       | 0.97     | 0.97     | 0.82                         | 0.82                       |
| PC4226IV                                | 0.82                          | 0.83             | 0.83         | 0.97     | 0.83                          | 0.82                       | 0.99     | 0.97     | 0.82                         | 0.83                       |
| <i>B. hampsonii</i> 30446               | 0.89                          | 0.87             | 0.86         | 0.82     | 0.85                          | 1.00                       | 0.82     | 0.82     | 0.89                         | 0.85                       |
| <i>B. hampsonii</i> 30599               | 0.89                          | 0.88             | 0.86         | 0.82     | 0.86                          | 0.94                       | 0.82     | 0.82     | 0.89                         | 0.86                       |
| PC3939II                                | 0.82                          | 0.83             | 0.83         | 0.97     | 0.83                          | 0.82                       | 0.97     | 0.97     | 0.82                         | 0.83                       |
| <i>B. alvinipulli</i> ATCC51933-T324    | 0.87                          | 0.86             | 0.85         | 0.82     | 0.86                          | 0.86                       | 0.82     | 0.82     | 0.87                         | 0.86                       |
| 513A <sup>T</sup>                       | 0.82                          | 0.83             | 0.82         | 0.97     | 0.83                          | 0.82                       | 0.97     | 0.97     | 0.82                         | 0.82                       |
| <i>B. suanatina</i> AN4859-03           | 1.00                          | 0.86             | 0.86         | 0.82     | 0.86                          | 0.89                       | 0.82     | 0.82     | 0.93                         | 0.86                       |
| <i>B. sp</i> G79                        | 0.86                          | 1.00             | 0.85         | 0.83     | 0.85                          | 0.87                       | 0.83     | 0.83     | 0.86                         | 0.86                       |
| PC5538III-hc                            | 0.86                          | 0.85             | 1.00         | 0.83     | 0.92                          | 0.86                       | 0.82     | 0.83     | 0.86                         | 0.92                       |
| PC2777IV                                | 0.82                          | 0.83             | 0.83         | 1.00     | 0.83                          | 0.83                       | 0.97     | 0.97     | 0.82                         | 0.83                       |
| <i>B. pilosicoli</i> P43/6/78           | 0.86                          | 0.85             | 0.92         | 0.83     | 1.00                          | 0.85                       | 0.83     | 0.83     | 0.86                         | 0.98                       |
| <i>B. hampsonii</i> NSH-24              | 0.89                          | 0.87             | 0.86         | 0.83     | 0.85                          | 1.00                       | 0.82     | 0.83     | 0.89                         | 0.86                       |
| PC5587-u                                | 0.82                          | 0.83             | 0.82         | 0.97     | 0.83                          | 0.82                       | 1.00     | 0.97     | 0.82                         | 0.82                       |
| PC3714II                                | 0.82                          | 0.83             | 0.83         | 0.97     | 0.83                          | 0.83                       | 0.97     | 1.00     | 0.82                         | 0.82                       |
| <i>B. hyodysenteriae</i> 865            | 0.93                          | 0.86             | 0.86         | 0.82     | 0.86                          | 0.89                       | 0.82     | 0.82     | 1.00                         | 0.86                       |
| <i>B. pilosicoli</i> B2904              | 0.86                          | 0.86             | 0.92         | 0.83     | 0.98                          | 0.86                       | 0.82     | 0.82     | 0.86                         | 1.00                       |
| <i>B. sp</i> CAG-700                    | 0.82                          | 0.83             | 0.83         | 0.97     | 0.83                          | 0.82                       | 0.99     | 0.97     | 0.82                         | 0.83                       |
| <i>B. hampsonii</i> NSH-16              | 0.89                          | 0.87             | 0.86         | 0.83     | 0.86                          | 0.94                       | 0.82     | 0.82     | 0.89                         | 0.86                       |
| PC3517II                                | 0.82                          | 0.83             | 0.83         | 0.97     | 0.83                          | 0.82                       | 0.97     | 0.97     | 0.82                         | 0.83                       |
| PC390II                                 | 0.82                          | 0.83             | 0.82         | 0.97     | 0.83                          | 0.82                       | 1.00     | 0.97     | 0.82                         | 0.82                       |
| PC4597II                                | 0.82                          | 0.83             | 0.83         | 0.97     | 0.83                          | 0.82                       | 0.99     | 0.97     | 0.82                         | 0.83                       |
| <i>B. pilosicoli</i> 95-1000            | 0.86                          | 0.85             | 0.92         | 0.83     | 0.99                          | 0.86                       | 0.82     | 0.83     | 0.86                         | 0.98                       |
| <i>B. hampsonii</i> P280-1              | 0.89                          | 0.87             | 0.86         | 0.83     | 0.85                          | 0.95                       | 0.82     | 0.82     | 0.89                         | 0.86                       |
| <i>B. hyodysenteriae</i> WA1            | 0.93                          | 0.86             | 0.86         | 0.82     | 0.86                          | 0.89                       | 0.82     | 0.82     | 0.99                         | 0.86                       |
| PC4580III                               | 0.82                          | 0.83             | 0.83         | 0.97     | 0.83                          | 0.82                       | 0.97     | 0.97     | 0.82                         | 0.83                       |
| <i>B. intermedia</i> PWS-A              | 0.93                          | 0.86             | 0.86         | 0.82     | 0.87                          | 0.89                       | 0.82     | 0.82     | 0.92                         | 0.87                       |
| <i>B. pilosicoli</i> WesB               | 0.86                          | 0.85             | 0.92         | 0.83     | 0.98                          | 0.86                       | 0.82     | 0.82     | 0.86                         | 0.98                       |
| <i>B. hyodysenteriae</i> FMV89-3323     | 0.93                          | 0.86             | 0.86         | 0.82     | 0.86                          | 0.89                       | 0.82     | 0.82     | 0.99                         | 0.86                       |
| <i>B. innocens</i> ATCC29796, B256-F811 | 0.86                          | 0.93             | 0.86         | 0.82     | 0.86                          | 0.88                       | 0.83     | 0.82     | 0.86                         | 0.86                       |
| PC5587-p                                | 0.82                          | 0.83             | 0.82         | 0.97     | 0.83                          | 0.82                       | 1.00     | 0.97     | 0.82                         | 0.82                       |
| PC2022III                               | 0.82                          | 0.83             | 0.83         | 0.97     | 0.83                          | 0.83                       | 0.97     | 0.97     | 0.82                         | 0.82                       |
| W1                                      | 0.82                          | 0.83             | 0.83         | 0.97     | 0.83                          | 0.82                       | 0.97     | 0.97     | 0.82                         | 0.82                       |
| <i>B. murdochii</i> DSM12563            | 0.86                          | 0.93             | 0.85         | 0.82     | 0.85                          | 0.88                       | 0.82     | 0.82     | 0.86                         | 0.85                       |
| PC3053II                                | 0.82                          | 0.83             | 0.83         | 0.97     | 0.83                          | 0.82                       | 0.97     | 0.97     | 0.82                         | 0.83                       |
| <i>B. hyodysenteriae</i> ATCC27164      | 0.93                          | 0.86             | 0.86         | 0.82     | 0.86                          | 0.89                       | 0.82     | 0.82     | 0.99                         | 0.86                       |

Supplementary table 6. Average Nucleotide Identity between strains of the *Brachyspira* genus- page 3

|                                         | <i>B. sp.</i> CAG-700 | <i>B. hampsonii</i> NSH-16 | PC3517II | PC390II | PC4597II | <i>B. pilosicoli</i> 95-1000 | <i>B. hampsonii</i> P280-1 | <i>B. hyodysenteriae</i> WA1 | PC4580III | <i>B. intermedia</i> PWS-A |
|-----------------------------------------|-----------------------|----------------------------|----------|---------|----------|------------------------------|----------------------------|------------------------------|-----------|----------------------------|
| <i>B. hyodysenteriae</i> NX             | 0.82                  | 0.89                       | 0.82     | 0.82    | 0.82     | 0.86                         | 0.89                       | 0.99                         | 0.82      | 0.92                       |
| PC5099IV                                | 0.99                  | 0.82                       | 0.97     | 0.99    | 0.99     | 0.83                         | 0.82                       | 0.82                         | 0.97      | 0.82                       |
| PC3997IV                                | 0.97                  | 0.82                       | 0.99     | 0.97    | 0.97     | 0.83                         | 0.82                       | 0.82                         | 0.97      | 0.82                       |
| PC5538III-lc                            | 0.97                  | 0.82                       | 0.97     | 0.97    | 0.97     | 0.83                         | 0.82                       | 0.82                         | 0.97      | 0.82                       |
| PC4226IV                                | 0.99                  | 0.82                       | 0.97     | 0.99    | 0.99     | 0.83                         | 0.82                       | 0.82                         | 0.97      | 0.82                       |
| <i>B. hampsonii</i> 30446               | 0.82                  | 0.94                       | 0.82     | 0.82    | 0.82     | 0.85                         | 0.95                       | 0.89                         | 0.82      | 0.89                       |
| <i>B. hampsonii</i> 30599               | 0.82                  | 1.00                       | 0.82     | 0.82    | 0.82     | 0.86                         | 0.94                       | 0.89                         | 0.82      | 0.89                       |
| PC3939II                                | 0.97                  | 0.82                       | 0.97     | 0.97    | 0.97     | 0.83                         | 0.82                       | 0.82                         | 0.97      | 0.82                       |
| <i>B. alvinipulli</i> ATCC51933-T324    | 0.82                  | 0.86                       | 0.82     | 0.82    | 0.82     | 0.86                         | 0.86                       | 0.87                         | 0.82      | 0.87                       |
| 513A <sup>T</sup>                       | 0.97                  | 0.82                       | 0.97     | 0.97    | 0.97     | 0.82                         | 0.82                       | 0.82                         | 0.97      | 0.82                       |
| <i>B. suanatina</i> AN4859-03           | 0.82                  | 0.89                       | 0.82     | 0.82    | 0.82     | 0.86                         | 0.89                       | 0.93                         | 0.82      | 0.93                       |
| <i>B. sp</i> G79                        | 0.83                  | 0.87                       | 0.83     | 0.83    | 0.83     | 0.85                         | 0.87                       | 0.86                         | 0.83      | 0.86                       |
| PC5538III-hc                            | 0.83                  | 0.86                       | 0.83     | 0.82    | 0.83     | 0.92                         | 0.86                       | 0.86                         | 0.83      | 0.86                       |
| PC2777IV                                | 0.97                  | 0.83                       | 0.97     | 0.97    | 0.97     | 0.83                         | 0.83                       | 0.82                         | 0.97      | 0.82                       |
| <i>B. pilosicoli</i> P43/6/78           | 0.83                  | 0.86                       | 0.83     | 0.83    | 0.83     | 0.99                         | 0.85                       | 0.86                         | 0.83      | 0.87                       |
| <i>B. hampsonii</i> NSH-24              | 0.82                  | 0.94                       | 0.82     | 0.82    | 0.82     | 0.86                         | 0.95                       | 0.89                         | 0.82      | 0.89                       |
| PC5587-u                                | 0.99                  | 0.82                       | 0.97     | 1.00    | 0.99     | 0.82                         | 0.82                       | 0.82                         | 0.97      | 0.82                       |
| PC3714II                                | 0.97                  | 0.82                       | 0.97     | 0.97    | 0.97     | 0.83                         | 0.82                       | 0.82                         | 0.97      | 0.82                       |
| <i>B. hyodysenteriae</i> 865            | 0.82                  | 0.89                       | 0.82     | 0.82    | 0.82     | 0.86                         | 0.89                       | 0.99                         | 0.82      | 0.92                       |
| <i>B. pilosicoli</i> B2904              | 0.83                  | 0.86                       | 0.83     | 0.82    | 0.83     | 0.98                         | 0.86                       | 0.86                         | 0.83      | 0.87                       |
| <i>B. sp</i> CAG-700                    | 1.00                  | 0.82                       | 0.97     | 0.99    | 0.99     | 0.83                         | 0.82                       | 0.82                         | 0.97      | 0.82                       |
| <i>B. hampsonii</i> NSH-16              | 0.82                  | 1.00                       | 0.82     | 0.82    | 0.82     | 0.86                         | 0.94                       | 0.89                         | 0.82      | 0.89                       |
| PC3517II                                | 0.97                  | 0.82                       | 1.00     | 0.97    | 0.97     | 0.83                         | 0.82                       | 0.82                         | 0.97      | 0.82                       |
| PC390II                                 | 0.99                  | 0.82                       | 0.97     | 1.00    | 0.99     | 0.82                         | 0.82                       | 0.82                         | 0.97      | 0.82                       |
| PC4597II                                | 0.99                  | 0.82                       | 0.97     | 0.99    | 1.00     | 0.82                         | 0.82                       | 0.82                         | 0.97      | 0.82                       |
| <i>B. pilosicoli</i> 95-1000            | 0.83                  | 0.86                       | 0.83     | 0.82    | 0.82     | 1.00                         | 0.86                       | 0.86                         | 0.83      | 0.87                       |
| <i>B. hampsonii</i> P280-1              | 0.82                  | 0.94                       | 0.82     | 0.82    | 0.82     | 0.86                         | 1.00                       | 0.89                         | 0.82      | 0.89                       |
| <i>B. hyodysenteriae</i> WA1            | 0.82                  | 0.89                       | 0.82     | 0.82    | 0.82     | 0.86                         | 0.89                       | 1.00                         | 0.82      | 0.92                       |
| PC4580III                               | 0.97                  | 0.82                       | 0.97     | 0.97    | 0.97     | 0.83                         | 0.82                       | 0.82                         | 1.00      | 0.82                       |
| <i>B. intermedia</i> PWS-A              | 0.82                  | 0.89                       | 0.82     | 0.82    | 0.82     | 0.87                         | 0.89                       | 0.92                         | 0.82      | 1.00                       |
| <i>B. pilosicoli</i> WesB               | 0.83                  | 0.86                       | 0.83     | 0.82    | 0.83     | 0.98                         | 0.86                       | 0.86                         | 0.83      | 0.86                       |
| <i>B. hyodysenteriae</i> FMV89-3323     | 0.82                  | 0.89                       | 0.82     | 0.82    | 0.82     | 0.86                         | 0.89                       | 0.99                         | 0.82      | 0.92                       |
| <i>B. innocens</i> ATCC29796, B256-F811 | 0.82                  | 0.88                       | 0.82     | 0.83    | 0.82     | 0.86                         | 0.88                       | 0.86                         | 0.82      | 0.86                       |
| PC5587-p                                | 0.99                  | 0.82                       | 0.97     | 1.00    | 0.99     | 0.82                         | 0.82                       | 0.82                         | 0.97      | 0.82                       |
| PC2022III                               | 0.97                  | 0.82                       | 0.97     | 0.97    | 0.97     | 0.83                         | 0.82                       | 0.82                         | 0.98      | 0.82                       |
| W1                                      | 0.97                  | 0.82                       | 0.97     | 0.97    | 0.97     | 0.83                         | 0.82                       | 0.82                         | 0.97      | 0.82                       |
| <i>B. murdochii</i> DSM12563            | 0.82                  | 0.88                       | 0.83     | 0.83    | 0.82     | 0.86                         | 0.88                       | 0.86                         | 0.83      | 0.86                       |
| PC3053II                                | 0.97                  | 0.82                       | 0.97     | 0.97    | 0.97     | 0.83                         | 0.82                       | 0.82                         | 0.97      | 0.82                       |
| <i>B. hyodysenteriae</i> ATCC27164      | 0.82                  | 0.89                       | 0.82     | 0.82    | 0.82     | 0.86                         | 0.89                       | 0.99                         | 0.82      | 0.92                       |

Supplementary table 6. Average Nucleotide Identity between strains of the *Brachyspira* genus- page 2

|                                         | <i>B. pilosicoli</i> WesB | <i>B. hyodysenteriae</i> FMV89-3323 | <i>B. innocens</i> ATCC29796, B256-F811 | PC5587-p | PC2022III | W1   | <i>B. murdochii</i> DSM12563 | PC3053II | <i>B. hyodysenteriae</i> ATCC27164 |
|-----------------------------------------|---------------------------|-------------------------------------|-----------------------------------------|----------|-----------|------|------------------------------|----------|------------------------------------|
| <i>B. hyodysenteriae</i> NX             | 0.86                      | 0.99                                | 0.86                                    | 0.82     | 0.82      | 0.82 | 0.86                         | 0.82     | 0.99                               |
| PC5099IV                                | 0.83                      | 0.82                                | 0.82                                    | 0.99     | 0.97      | 0.97 | 0.82                         | 0.97     | 0.82                               |
| PC3997IV                                | 0.83                      | 0.82                                | 0.82                                    | 0.97     | 0.97      | 0.97 | 0.82                         | 0.97     | 0.82                               |
| PC5538III-lc                            | 0.82                      | 0.82                                | 0.82                                    | 0.97     | 0.97      | 0.97 | 0.82                         | 0.97     | 0.82                               |
| PC4226IV                                | 0.83                      | 0.82                                | 0.82                                    | 0.99     | 0.97      | 0.97 | 0.82                         | 0.97     | 0.82                               |
| <i>B. hampsonii</i> 30446               | 0.85                      | 0.89                                | 0.88                                    | 0.82     | 0.82      | 0.82 | 0.88                         | 0.82     | 0.89                               |
| <i>B. hampsonii</i> 30599               | 0.86                      | 0.89                                | 0.88                                    | 0.82     | 0.82      | 0.82 | 0.88                         | 0.82     | 0.89                               |
| PC3939II                                | 0.83                      | 0.82                                | 0.82                                    | 0.97     | 0.97      | 0.97 | 0.82                         | 0.97     | 0.82                               |
| <i>B. alvinipulli</i> ATCC51933-T324    | 0.86                      | 0.87                                | 0.86                                    | 0.82     | 0.82      | 0.82 | 0.86                         | 0.82     | 0.87                               |
| 513A <sup>T</sup>                       | 0.82                      | 0.82                                | 0.82                                    | 0.97     | 0.97      | 0.97 | 0.82                         | 0.97     | 0.82                               |
| <i>B. suanatina</i> AN4859-03           | 0.86                      | 0.93                                | 0.86                                    | 0.82     | 0.82      | 0.82 | 0.86                         | 0.82     | 0.93                               |
| <i>B. sp</i> G79                        | 0.85                      | 0.86                                | 0.93                                    | 0.83     | 0.83      | 0.83 | 0.93                         | 0.83     | 0.86                               |
| PC5538III-hc                            | 0.92                      | 0.86                                | 0.86                                    | 0.82     | 0.83      | 0.83 | 0.85                         | 0.83     | 0.86                               |
| PC2777IV                                | 0.83                      | 0.82                                | 0.82                                    | 0.97     | 0.97      | 0.97 | 0.82                         | 0.97     | 0.82                               |
| <i>B. pilosicoli</i> P43/6/78           | 0.98                      | 0.86                                | 0.86                                    | 0.83     | 0.83      | 0.83 | 0.85                         | 0.83     | 0.86                               |
| <i>B. hampsonii</i> NSH-24              | 0.86                      | 0.89                                | 0.88                                    | 0.82     | 0.83      | 0.82 | 0.88                         | 0.82     | 0.89                               |
| PC5587-u                                | 0.82                      | 0.82                                | 0.83                                    | 1.00     | 0.97      | 0.97 | 0.82                         | 0.97     | 0.82                               |
| PC3714II                                | 0.82                      | 0.82                                | 0.82                                    | 0.97     | 0.97      | 0.97 | 0.82                         | 0.97     | 0.82                               |
| <i>B. hyodysenteriae</i> 865            | 0.86                      | 0.99                                | 0.86                                    | 0.82     | 0.82      | 0.82 | 0.86                         | 0.82     | 0.99                               |
| <i>B. pilosicoli</i> B2904              | 0.98                      | 0.86                                | 0.86                                    | 0.82     | 0.82      | 0.82 | 0.85                         | 0.83     | 0.86                               |
| <i>B. sp</i> CAG-700                    | 0.83                      | 0.82                                | 0.82                                    | 0.99     | 0.97      | 0.97 | 0.82                         | 0.97     | 0.82                               |
| <i>B. hampsonii</i> NSH-16              | 0.86                      | 0.89                                | 0.88                                    | 0.82     | 0.82      | 0.82 | 0.88                         | 0.82     | 0.89                               |
| PC3517II                                | 0.83                      | 0.82                                | 0.82                                    | 0.97     | 0.97      | 0.97 | 0.83                         | 0.97     | 0.82                               |
| PC390II                                 | 0.82                      | 0.82                                | 0.83                                    | 1.00     | 0.97      | 0.97 | 0.83                         | 0.97     | 0.82                               |
| PC4597II                                | 0.83                      | 0.82                                | 0.82                                    | 0.99     | 0.97      | 0.97 | 0.82                         | 0.97     | 0.82                               |
| <i>B. pilosicoli</i> 95-1000            | 0.98                      | 0.86                                | 0.86                                    | 0.82     | 0.83      | 0.83 | 0.86                         | 0.83     | 0.86                               |
| <i>B. hampsonii</i> P280-1              | 0.86                      | 0.89                                | 0.88                                    | 0.82     | 0.82      | 0.82 | 0.88                         | 0.82     | 0.89                               |
| <i>B. hyodysenteriae</i> WA1            | 0.86                      | 0.99                                | 0.86                                    | 0.82     | 0.82      | 0.82 | 0.86                         | 0.82     | 0.99                               |
| PC4580III                               | 0.83                      | 0.82                                | 0.82                                    | 0.97     | 0.98      | 0.97 | 0.83                         | 0.97     | 0.82                               |
| <i>B. intermedia</i> PWS-A              | 0.86                      | 0.92                                | 0.86                                    | 0.82     | 0.82      | 0.82 | 0.86                         | 0.82     | 0.92                               |
| <i>B. pilosicoli</i> WesB               | 1.00                      | 0.86                                | 0.86                                    | 0.82     | 0.83      | 0.82 | 0.86                         | 0.82     | 0.86                               |
| <i>B. hyodysenteriae</i> FMV89-3323     | 0.86                      | 1.00                                | 0.86                                    | 0.82     | 0.82      | 0.82 | 0.86                         | 0.82     | 0.99                               |
| <i>B. innocens</i> ATCC29796, B256-F811 | 0.86                      | 0.86                                | 1.00                                    | 0.83     | 0.82      | 0.82 | 0.93                         | 0.82     | 0.86                               |
| PC5587-p                                | 0.82                      | 0.82                                | 0.83                                    | 1.00     | 0.97      | 0.97 | 0.82                         | 0.97     | 0.82                               |
| PC2022III                               | 0.83                      | 0.82                                | 0.82                                    | 0.97     | 1.00      | 0.97 | 0.82                         | 0.97     | 0.82                               |
| W1                                      | 0.82                      | 0.82                                | 0.82                                    | 0.97     | 0.97      | 1.00 | 0.82                         | 0.97     | 0.82                               |
| <i>B. murdochii</i> DSM12563            | 0.86                      | 0.86                                | 0.93                                    | 0.82     | 0.82      | 0.82 | 1.00                         | 0.83     | 0.86                               |
| PC3053II                                | 0.82                      | 0.82                                | 0.82                                    | 0.97     | 0.97      | 0.97 | 0.83                         | 1.00     | 0.82                               |
| <i>B. hyodysenteriae</i> ATCC27164      | 0.86                      | 0.99                                | 0.86                                    | 0.82     | 0.82      | 0.82 | 0.86                         | 0.82     | 1.00                               |

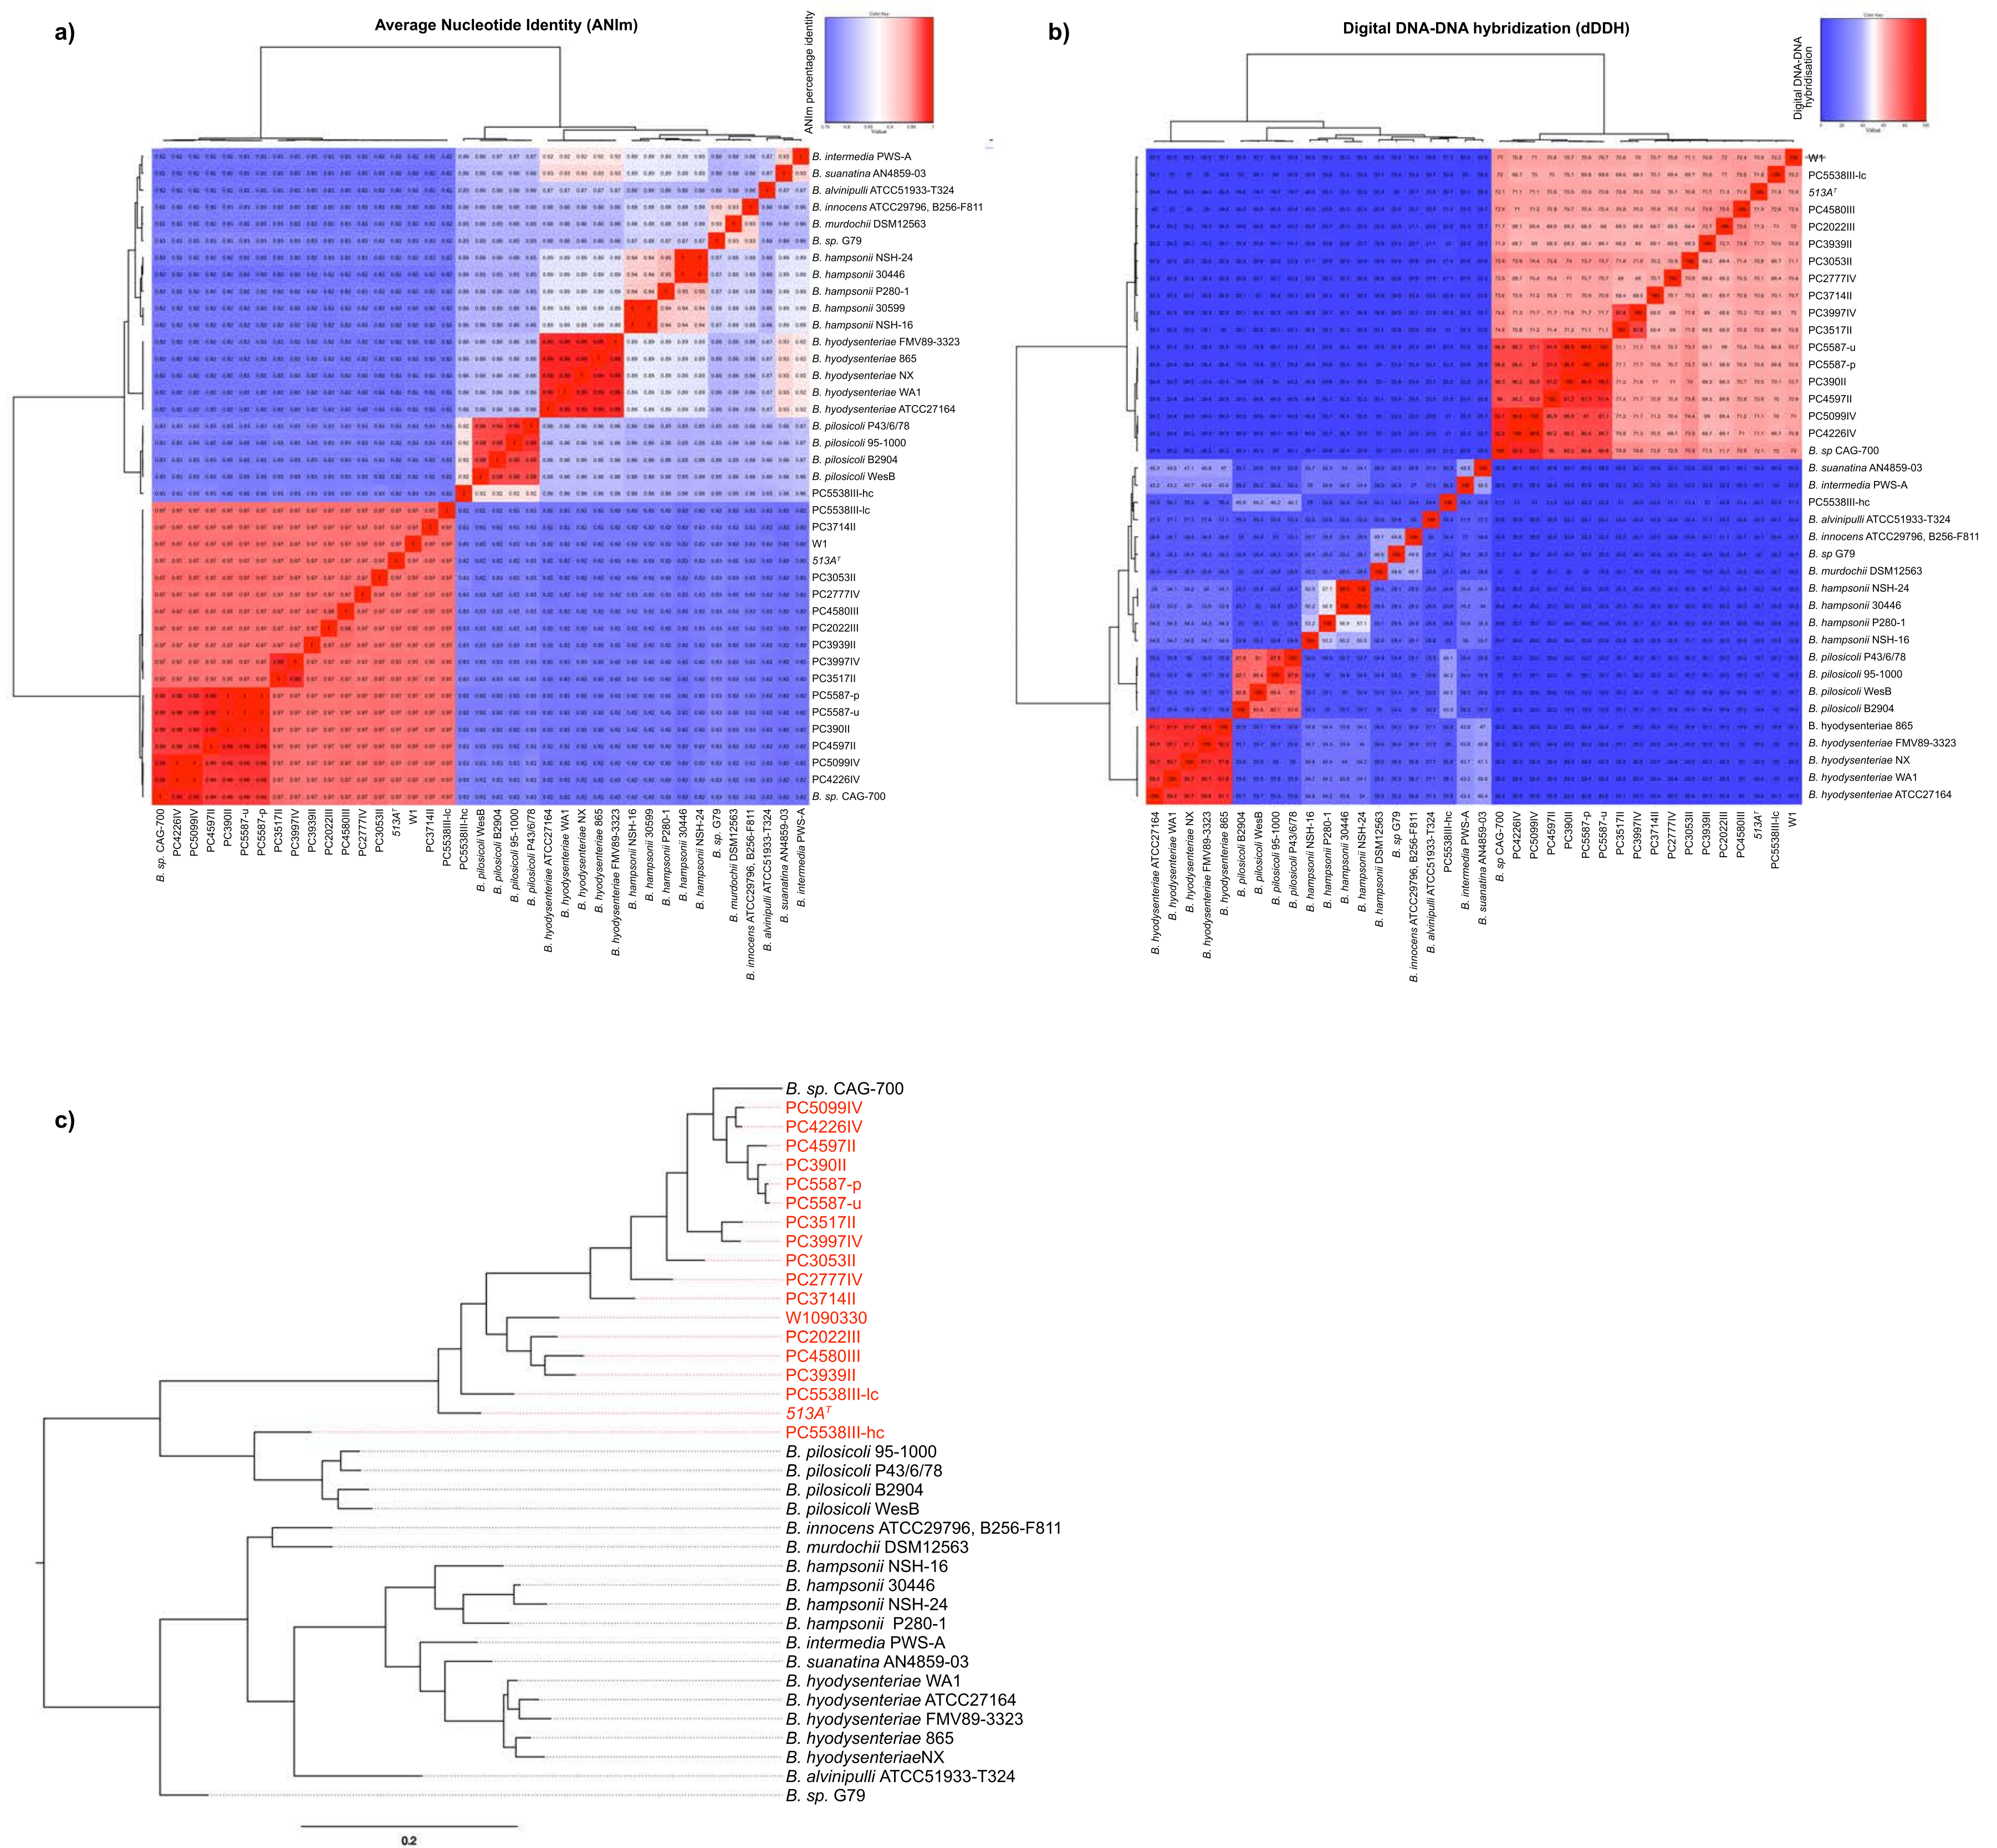

**Figure S1.** Comparative genomics within the *Brachyspira* genus. A) Average Nucleotide Identity (ANI) comparison. B) Digital DNA-DNA Hybridisation (dDDH) comparison. C) Tree based on accessory genome analysis (presence/absence of accessory genes).

Tree scale: 1

**Sialidase annotation inference**

- UniProtKB:P10481 (*Clostridium perfringens* nanH)
- UniProtKB:P15698 (*Paenicoelidium sordellii* Sialidase)
- UniProtKB:Q02834 (*Micromonospora viridifaciens* nedA)
- Predicted CDS with no database match

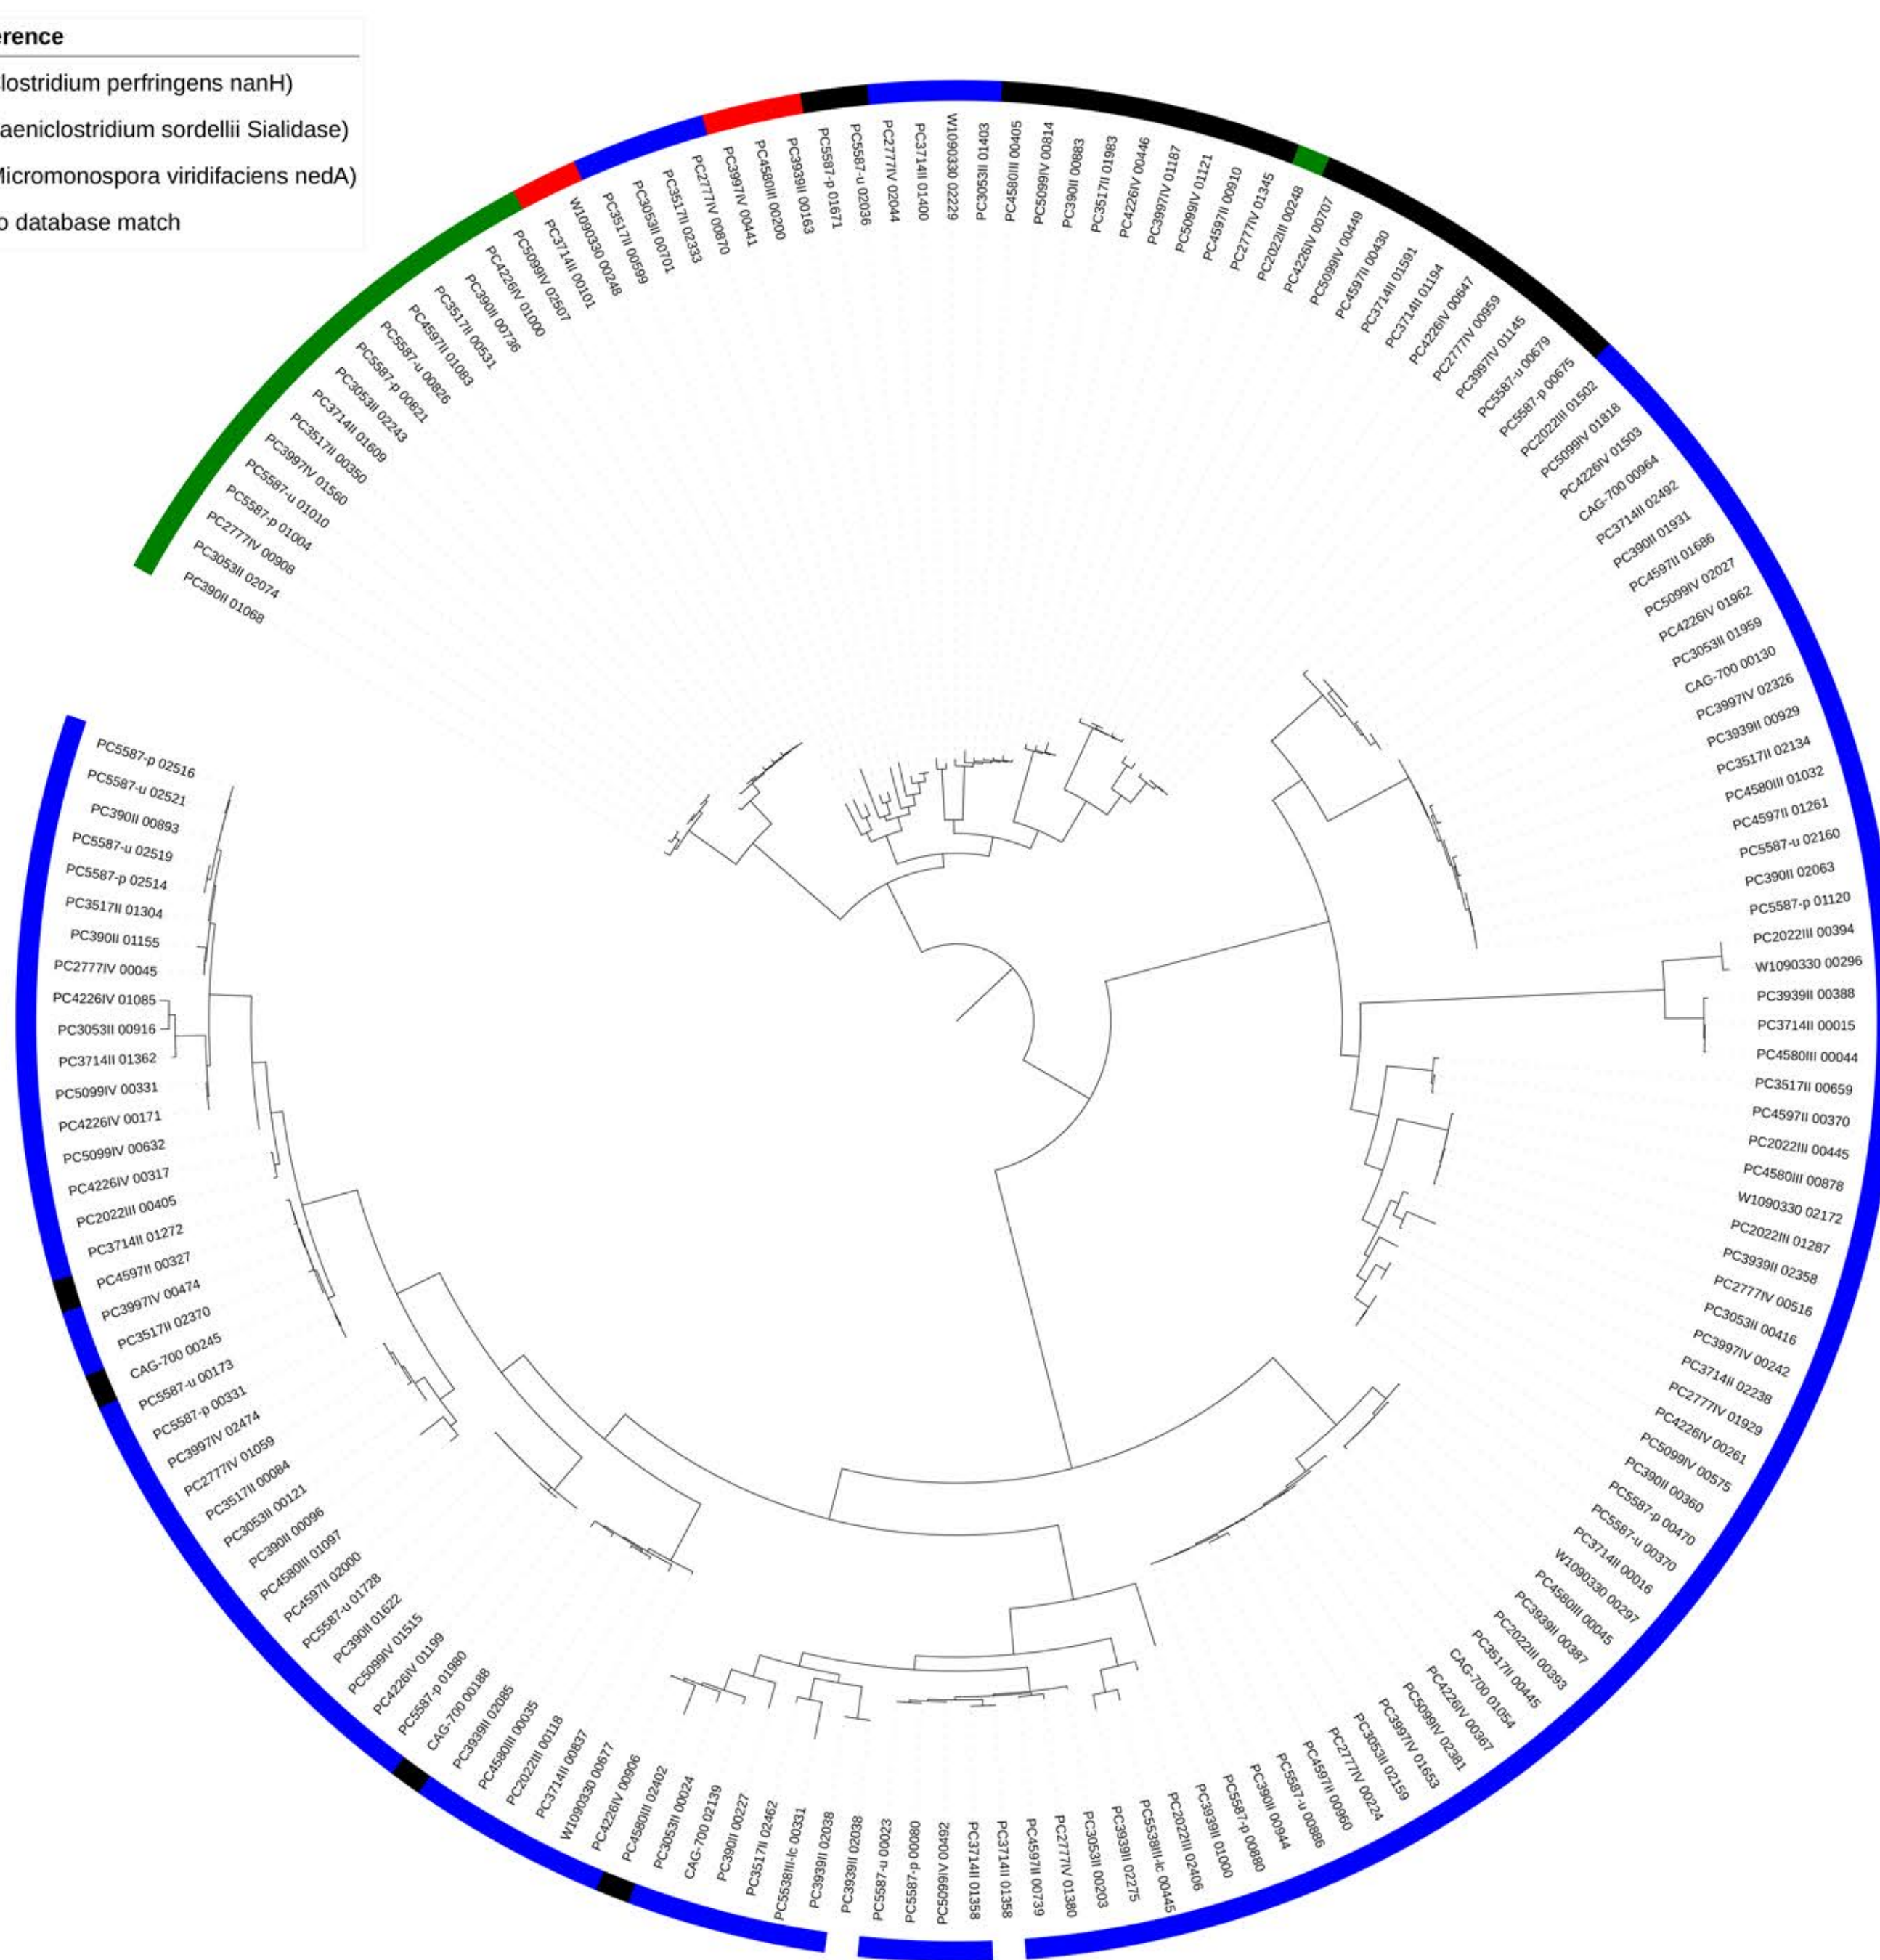

| Strain       | # sialidase genes |
|--------------|-------------------|
| PC3714II     | 13                |
| PC4226IV     | 13                |
| PC3517II     | 12                |
| PC390II      | 12                |
| PC5099IV     | 12                |
| PC5587-p     | 12                |
| PC5587-u     | 12                |
| PC2777IV     | 11                |
| PC3053II     | 11                |
| PC4597II     | 10                |
| PC2022III    | 9                 |
| PC3939II     | 9                 |
| PC3997IV     | 9                 |
| PC4580III    | 9                 |
| CAG-700      | 6                 |
| W1           | 6                 |
| PC5538III-lc | 2                 |
| 513A         | 0                 |

**Figure S2.** Maximum Likelihood tree of the genes annotated to encode for Sialidase in the *B. aalborgi* genomes. Leaves are coloured according to the source of annotation inference and the table is summarizing the number of sialidase genes per isolate.

a)

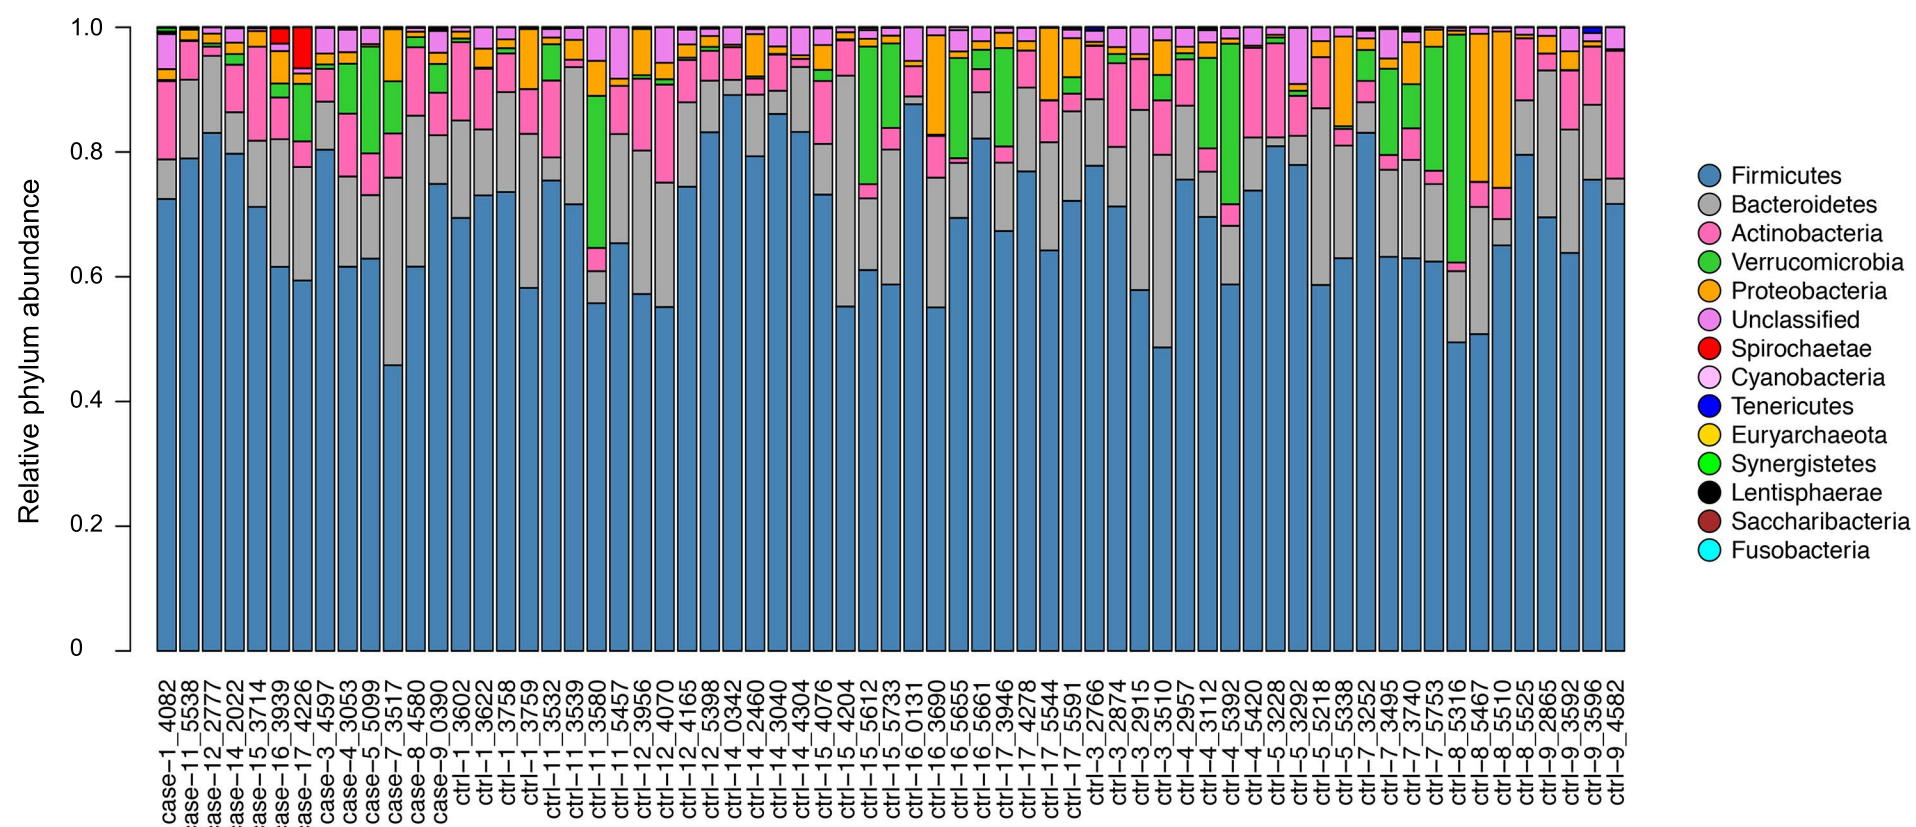

b)

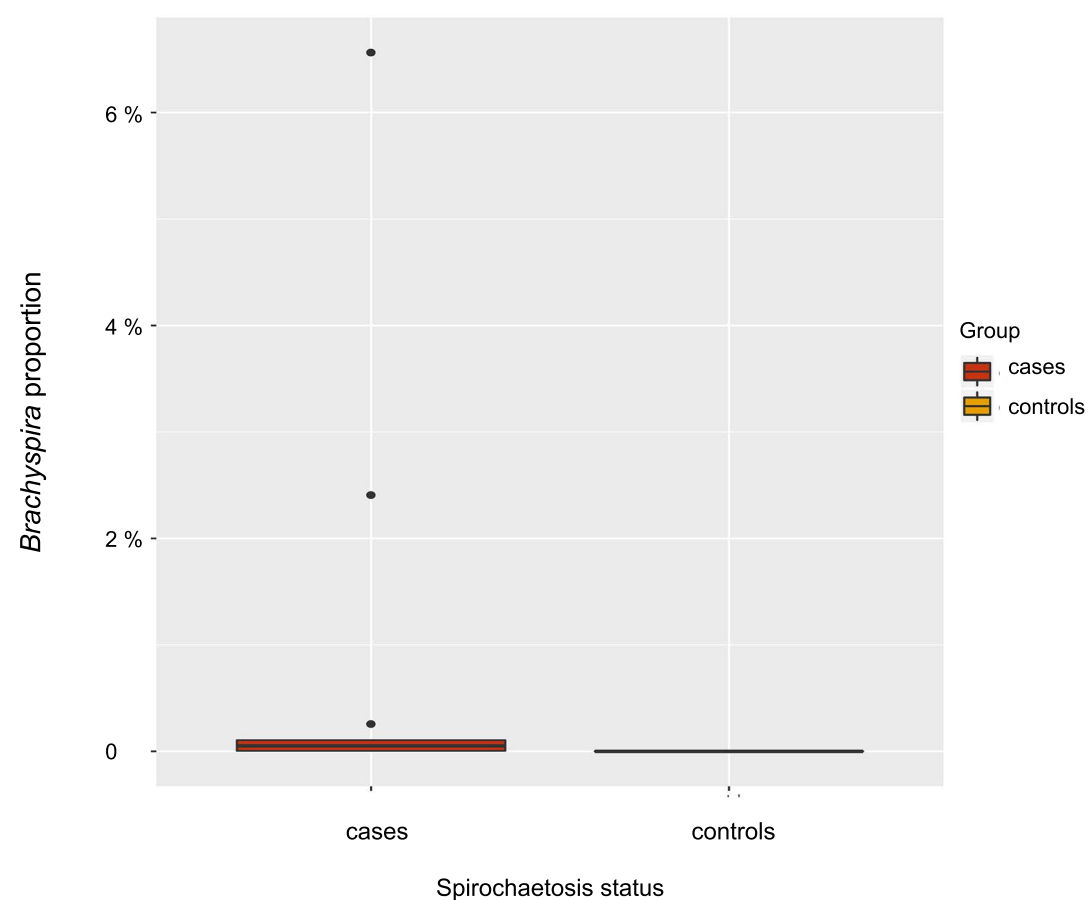

**Figure S3.** 16S amplicon-based microbiota analysis in spirochaetosis cases and unaffected controls. A) Relative phylum composition in cases and controls. B) Proportion of reads assigned to the *Brachyspira* genus, cases and controls.



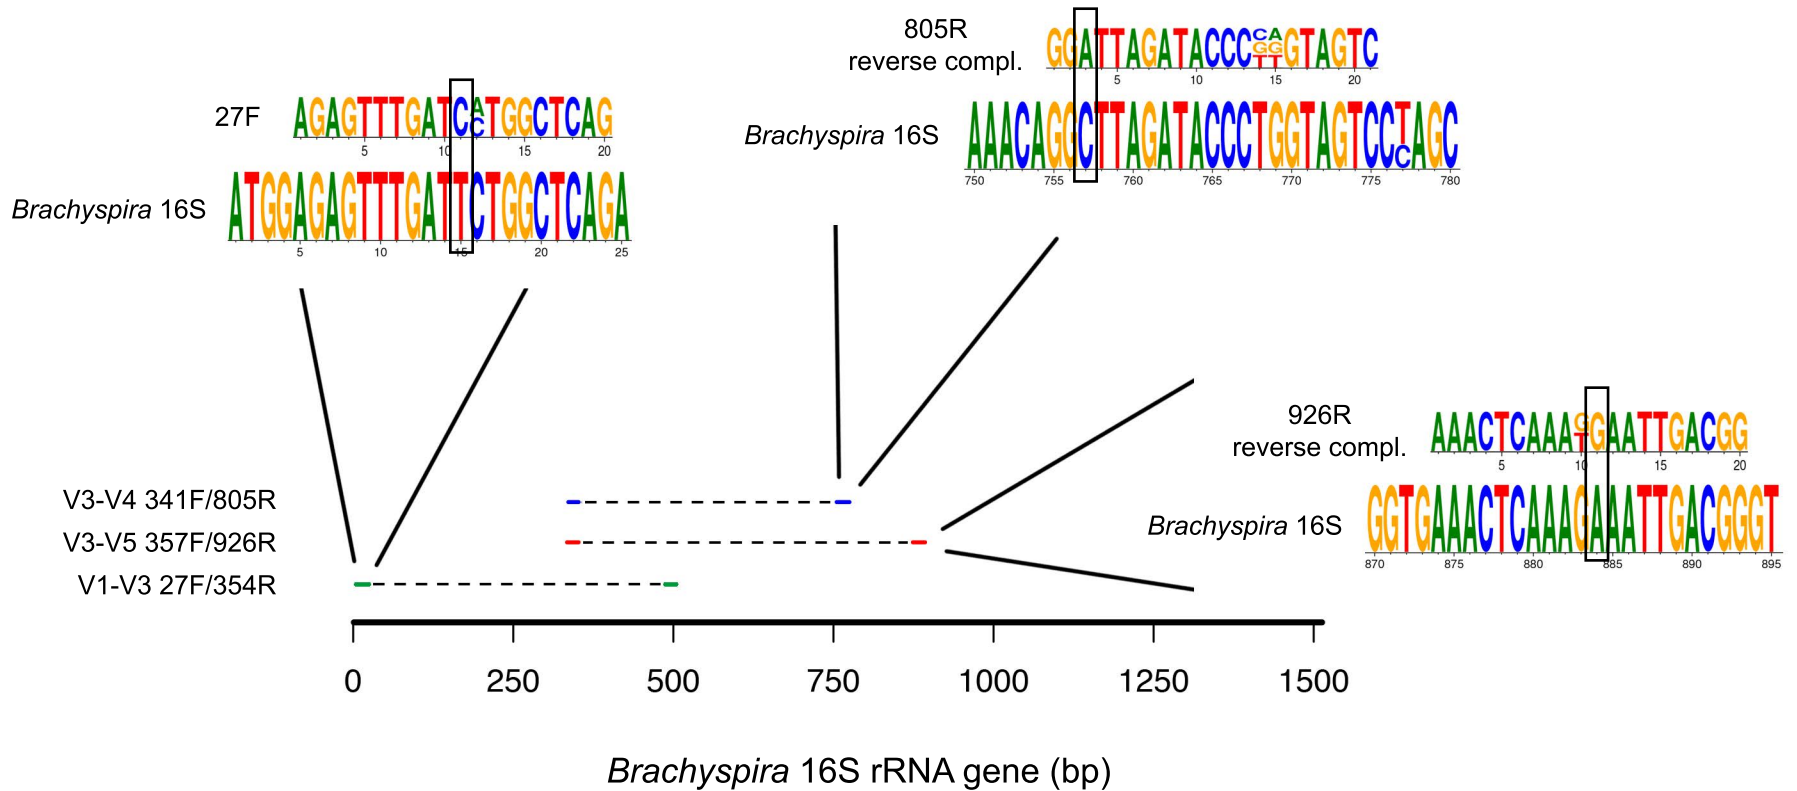

**Figure S4.** Primer mismatches in the different primer combinations compared to *Brachyspira* 16S rRNA sequences. Magnified areas show WebLogo representation of the *Brachyspira* 16S alignment in the primer target regions, together with the primers in question. Boxes mark the bases with mismatches.

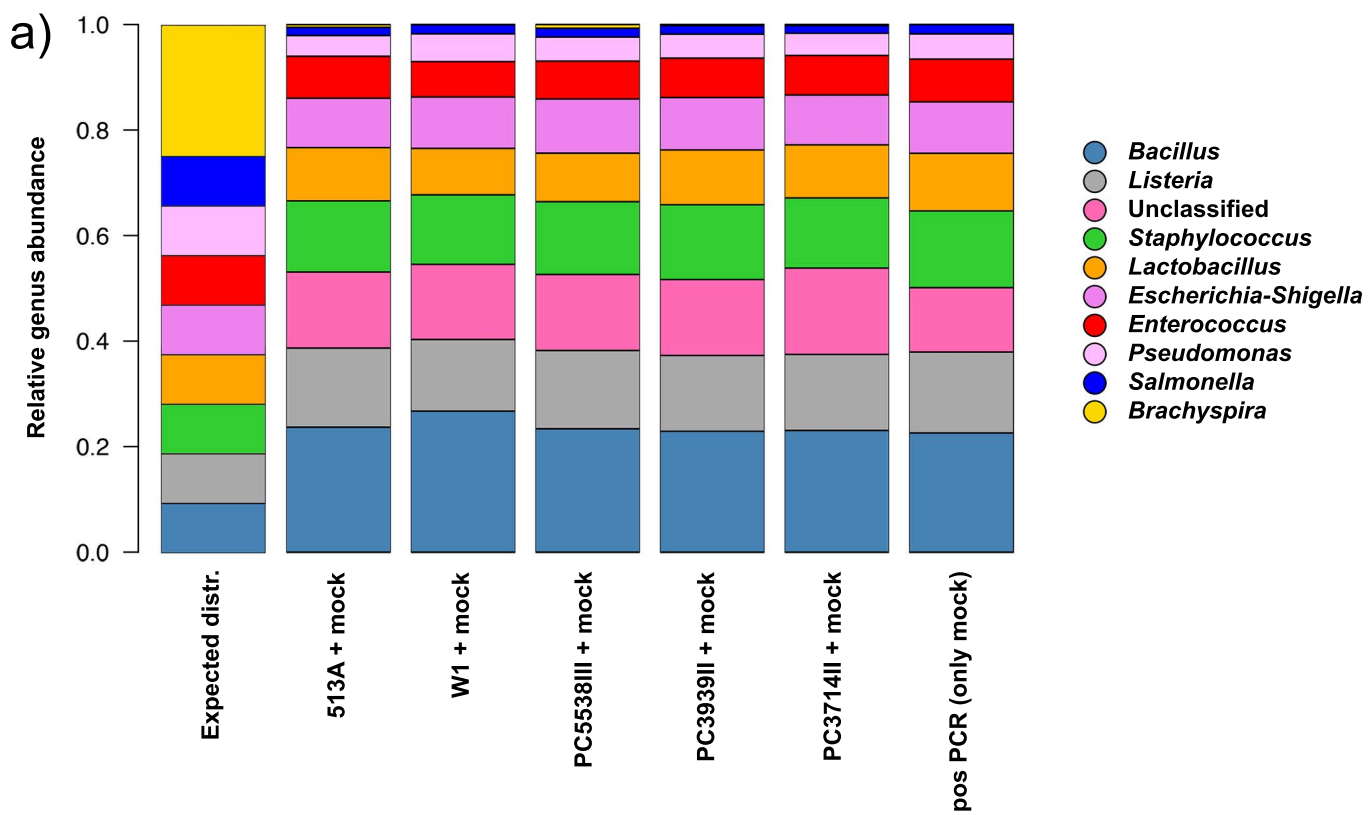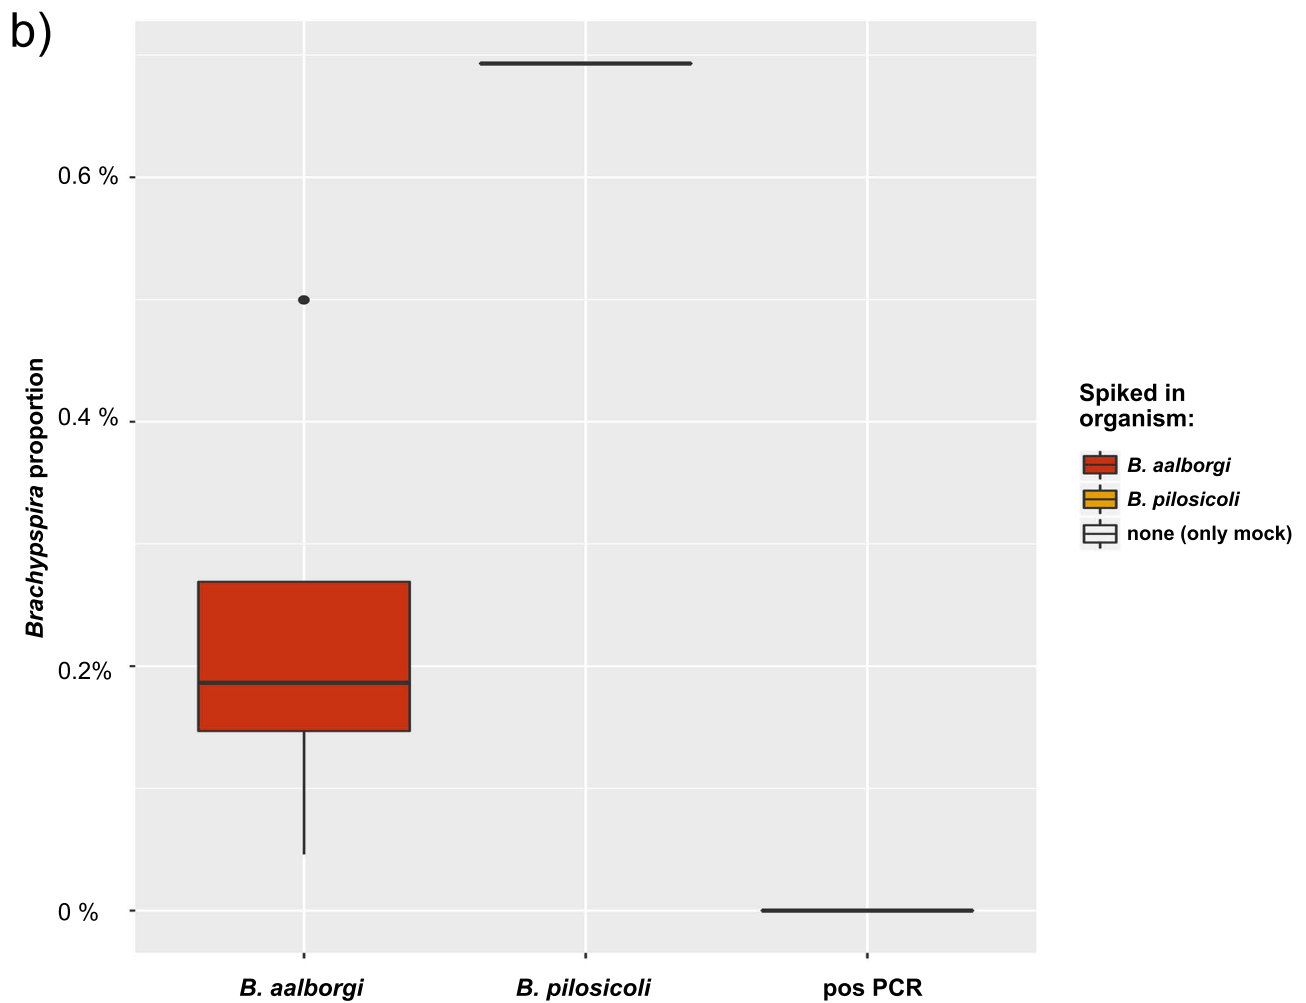

**Figure S5.** Verification of primer failure in samples of known compositions. All samples were containing a 1:3 proportion of pure *Brachyspira* DNA and a mock community. A) Phylum composition in the different samples. B) Proportion of reads classified to the *Brachyspira* genus depending on the *Brachyspira* species spiked in. The left-most column represents the expected distribution.

a) groups ● cases ● controls

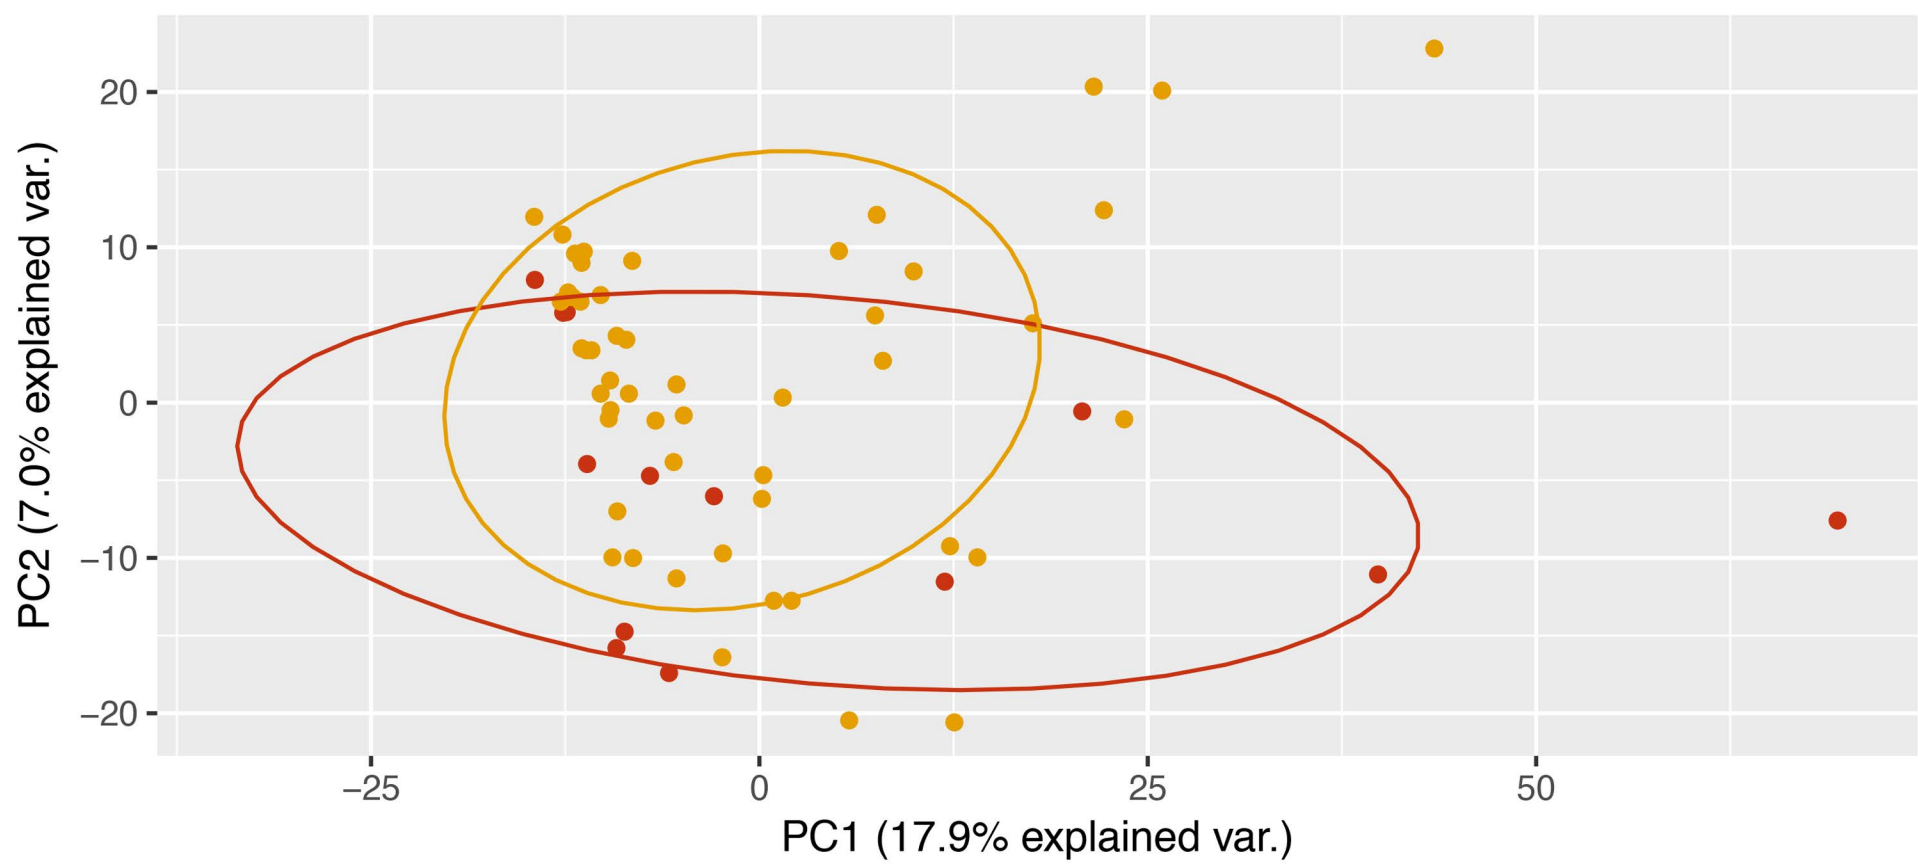

b)

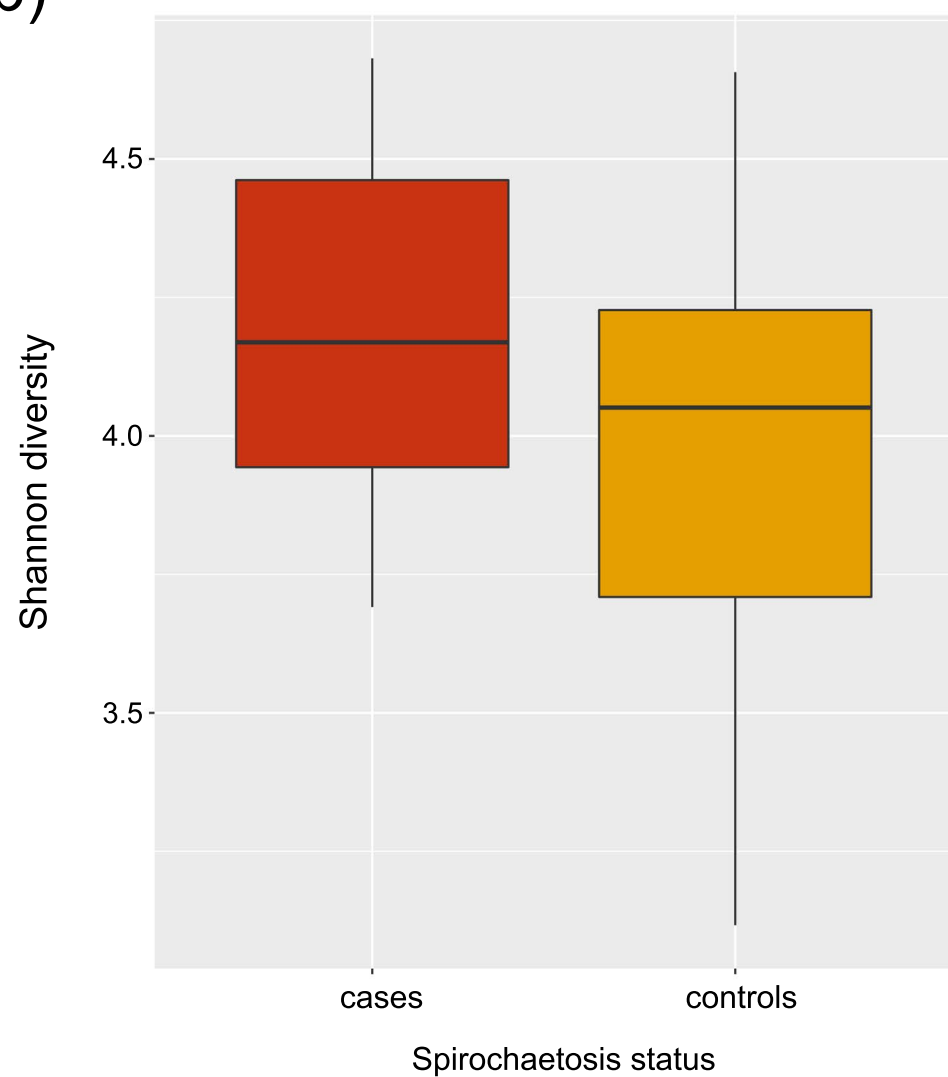

c)

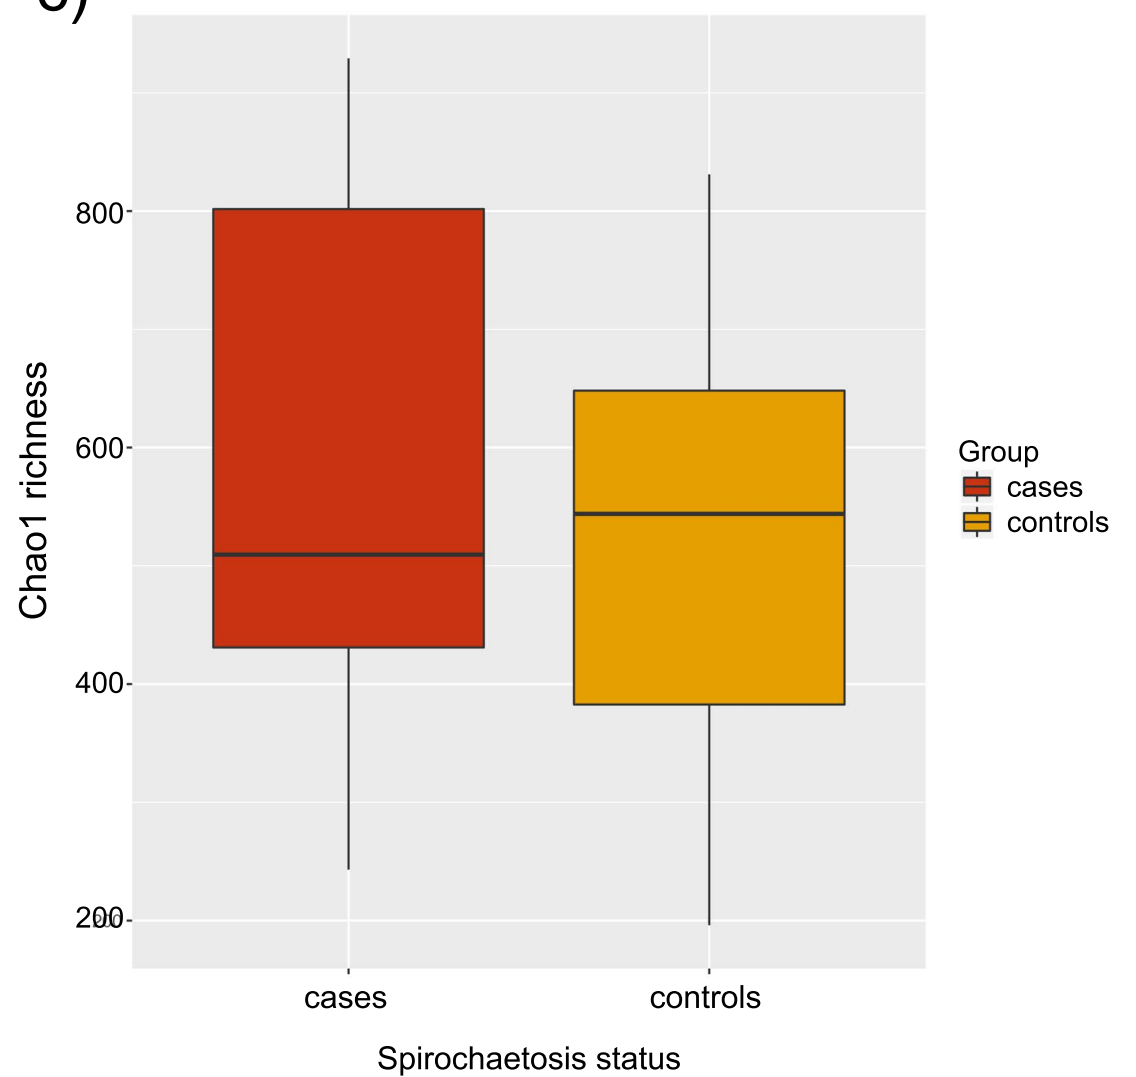

**Figure S6.** 16S amplicon-based microbiota analysis in spirochaetosis cases and unaffected controls. A) Principle component analysis of OTU composition in cases and controls. B) Shannon & Chao1 diversity

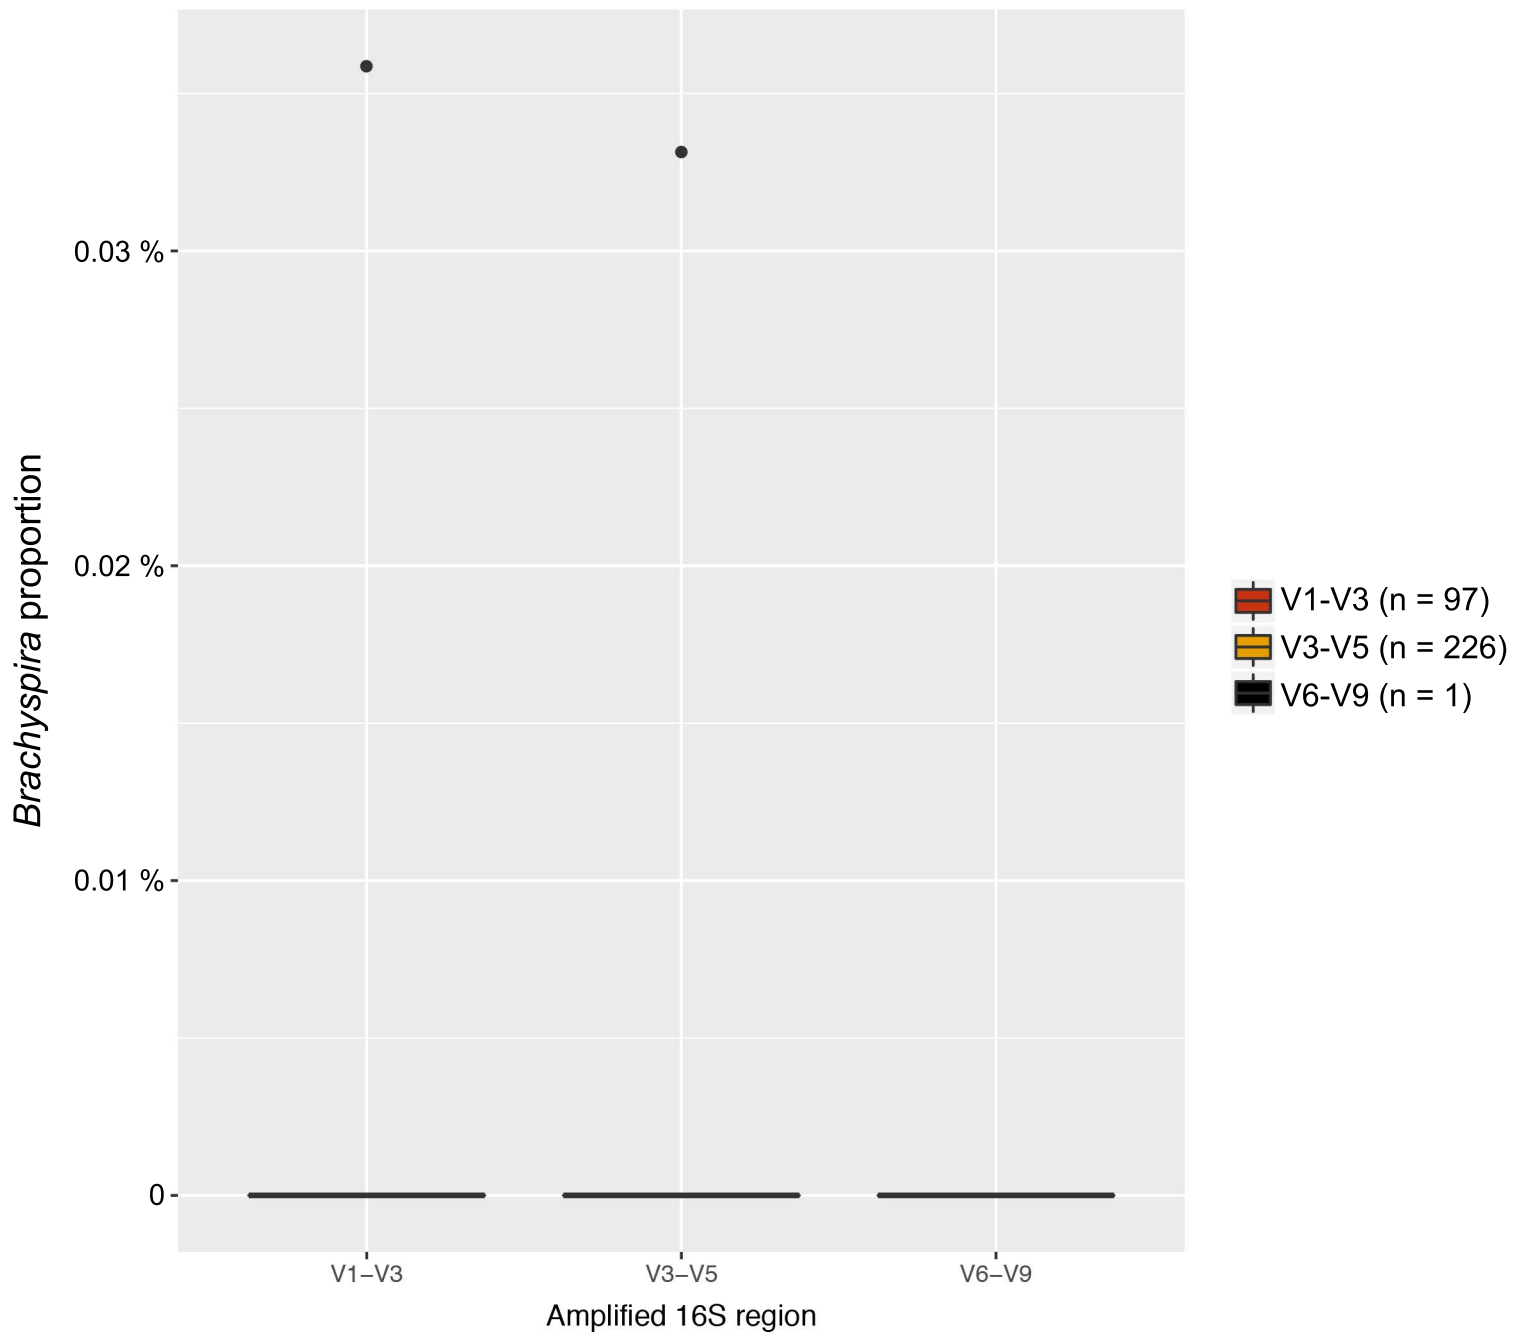

**Figure S7.** Proportion of reads assigned to the *Brachyspira* genus in 324 individuals from the Human Microbiome Project (HMP).
